1    **Reemployment of Kupffer's vesicle cells into axial and paraxial mesoderm**  
2    **via transdifferentiation**

3

4    Takafumi Ikeda<sup>1</sup>, Kiichi Inamori<sup>1</sup>, Toru Kawanishi<sup>1</sup>, Hiroyuki Takeda<sup>1\*</sup>

5

6

7

8    1 Laboratory of Embryology, Department of Biological Sciences, Graduate School of

9    Science, The University of Tokyo, 7-3-1 Hongo, Bunkyo-ku, Tokyo 113-0033, Japan

10

11    \*To whom correspondence should be addressed.

12    Fax: (+81) 3-5841-4434. e-mail: htakeda@bs.s.u-tokyo.ac.jp

13

14 **Abstract (150-250 words)**

15 Kupffer's vesicle (KV) in the teleost embryo is a fluid-filled vesicle surrounded by a  
 16 layer of epithelial cells with rotating primary cilia. KV transiently acts as the left-right  
 17 organizer but degenerates after the establishment of left-right asymmetric gene  
 18 expression. Previous labelling experiments indicated that descendants of KV-epithelial  
 19 cells are incorporated into mesodermal tissues after KV collapses (KV-collapse) in  
 20 zebrafish embryos. However, the overall picture of their differentiation potency had  
 21 been unclear due to the lack of suitable genetic tools and molecular analyses. In the  
 22 present study, we established a novel zebrafish transgenic line with a promoter of  
 23 *charon*, in which all KV-epithelial cells and their descendants are specifically labelled  
 24 until the larval stage. We found that KV-epithelial cells underwent epithelial-  
 25 mesenchymal transition upon KV-collapse and infiltrate into adjacent mesodermal  
 26 progenitors, the presomitic mesoderm and chordoneural hinge. Once incorporated, the  
 27 descendants of KV-epithelial cells expressed distinct mesodermal differentiation  
 28 markers and contributed to the mature populations such as the axial muscles and  
 29 notochordal sheath through normal developmental process. These results indicate that  
 30 fully differentiated KV-epithelial cells possess unique plasticity in that they are  
 31 reemployed into mesodermal lineages through transdifferentiation after they complete

32 their initial role in KV. (194 words)

33

34 **Keywords (4-6 words)**

35 charon, zebrafish, Kupffer's vesicle, transdifferentiation

36

## 37 Introduction

38 Kupffer's vesicle (KV) is a teleost-specific organ, which is transiently formed on the  
39 ventral side of the embryonic tailbud (Brummett and Dumont, 1978; Kupffer, 1868).  
40 KV consists of a fluid-filled lumen and its surrounding epithelial cells (hereafter  
41 referred to as KV-epithelial cells), and functions as the left-right organizer (LRO),  
42 playing a crucial role in left-right axis formation in the embryo (Essner et al., 2005). In  
43 the zebrafish, KV-epithelial cells are derived from a special group of cells called dorsal  
44 forerunner cells (DFCs; Melby et al., 1996; Oteíza et al., 2008). DFCs originally bear  
45 endodermal character as they express endoderm-specific genes, *sox32* and *sox17*  
46 (Alexander et al., 1999; Kikuchi et al., 2001; Warga and Kane, 2018). During epiboly  
47 stages, DFCs are transformed into KV-epithelial cells through mesenchymal-epithelial  
48 transition (Amack et al., 2007; Matsui et al., 2015; Oteíza et al., 2008; Zhang et al.,  
49 2016). At early somite stages, each KV-epithelial cell protrudes a primary cilium on the  
50 apical side, which rotates and generates the leftward fluid flow in the KV lumen (Essner  
51 et al., 2005). Sensed by primary cilia themselves, the leftward flow induces left-right  
52 asymmetric gene expression in and around KV, leading to left-sided expression of *nodal*  
53 in the lateral plate mesoderm (LPM; Essner et al., 2005). Judged by their morphological  
54 characteristics and specialized function, KV-epithelial cells are considered as fully

55 differentiated and functional cells.

56           In the light of the fate plasticity in matured cells, we were interested in the fate  
57 of KV-epithelial cells after they complete their mission in left-right patterning. Indeed,  
58 KV collapses and disappears soon after the establishment of the asymmetric gene  
59 expression in the LPM (hereafter referred to as KV-collapse), but previous lineage-  
60 tracing studies of DFCs demonstrated that upon KV-collapse, descendants of DFCs are  
61 incorporated into mesodermal tissues such as notochord, somites and tail mesenchyme  
62 (Cooper and D'Amico, 1996; Melby et al., 1996). However, detailed tracking and  
63 molecular characterization of those incorporated cells have not been performed so far,  
64 and thus we do not know yet whether ciliated KV-epithelial cells actually possess fate  
65 plasticity to transdifferentiate into functional mesodermal cells.

66           Recently, several transgenic zebrafish lines that express fluorescent proteins in  
67 DFCs and KV were generated for easier and more reliable tracing of DFC- and KV-  
68 derived cells. Among them, *sox17* lines have been frequently used because *sox17*  
69 promoter uniformly labels both DFCs and KV-epithelial cells from epiboly to  
70 somitogenesis stages (Compagnon et al., 2014; Mizoguchi et al., 2008; Oteíza et al.,  
71 2008; Sakaguchi et al., 2006). Furthermore, a recent work using *sox17:GFP-CAAX* line  
72 reported the epithelial-to-mesenchymal transition (EMT) of KV-epithelial cells during

73 KV-collapse (Amack, 2021), but their fate after EMT has not been directly tracked yet.  
 74 For specific fate tracking of KV-epithelial cells, the *sox17* lines are not necessarily  
 75 suitable, because endodermal cells as well as DFCs are broadly labelled (Mizoguchi et  
 76 al., 2008). Other transgenic lines marking KV-epithelial cells (summarized in Table 1)  
 77 have a similar limitation (Caron et al., 2012; Chen et al., 2012; Du and Dienhart, 2001;  
 78 Molina et al., 2007). Thus, for precise tracing, another transgenic line was required in  
 79 which mature KV-epithelial cells are specifically and uniformly labelled.

80 Here, we established novel transgenic lines, in which entire KV-epithelial cells are  
 81 specifically labelled, using the promoter of *charon*. *charon* encodes a secreted Nodal  
 82 antagonist belonging to the DAN family (Hashimoto et al., 2004). Its expression starts  
 83 shortly after the differentiation of KV-epithelial cells from DFCs, and is highly specific  
 84 to KV-epithelial cells both in zebrafish and medaka (Hashimoto et al., 2004; Hojo et al.,  
 85 2007). The expression of *charon* is initially symmetric, but gradually becomes right-  
 86 sided under the control of the leftward flow in KV (Hojo et al., 2007; Lopes et al., 2010).  
 87 The essential role of *charon* in the left-right patterning is conserved among vertebrates as  
 88 *charon*-knockout mice and zebrafish both exhibit randomized left-right axis (Marques et  
 89 al., 2004; Montague et al., 2018).

90 Using these *charon* lines, we first confirmed that after KV-collapse, KV-derived

91 cells (KVDCs) differentiate into mesodermal but not into ectodermal or endodermal  
92 tissues. Detailed timelapse imaging and gene-expression analyses further revealed that  
93 KVDCs undergo EMT and infiltrate into two types of undifferentiated mesoderm,  
94 which are the presomitic mesoderm and the chordoneural hinge. Importantly, they  
95 expressed differentiation markers similar to their surrounding mesodermal cells at later  
96 stages. These findings demonstrate that KV-epithelial cells possess high plasticity after  
97 completing their initial role in KV, and that they transdifferentiate into mesodermal  
98 lineages during normal development.

99

100 Table 1: Transgenic lines in zebrafish for the visualization of DFCs and KV-epithelial  
101 cells

| Promoter       | Expression area<br>at epiboly and somite stage | Timing                   | Length | Literature                                     |
|----------------|------------------------------------------------|--------------------------|--------|------------------------------------------------|
| <i>crestin</i> | Dorsal enveloping layer and KV                 | From DFCs (~50% epiboly) | 1 kb   | Chen et al., 2012                              |
| <i>foxj1</i>   | Pronephric duct, floor plate and KV            | From DFCs (~95% epiboly) | 0.6 kb | Caron et al., 2012                             |
| <i>dusp6</i>   | Mid-hindbrain boundary,<br>Rhombomere 4 and KV | From DFCs (bud stage)    | 10 kb  | Molina et al., 2007                            |
| <i>sox17</i>   | Endoderm and KV                                | From DFCs (~80% epiboly) | 5.0 kb | Sakaguchi et al., 2006;<br>Oteiza et al., 2008 |
| <i>twhh</i>    | Notochord and KV                               | From 12 hpf              | 5.2 kb | Du & Dienhart, 2001                            |
| <i>charon</i>  | KV                                             | From ~6 somite stage     | 5.0 kb | Gourronc et al., 2007;<br>the present study    |

102

103

## 104     **Results**

### 105     Establishment of *charon:EGFP* to specifically label KV-epithelial cells

106     To establish transgenic lines in which KV-epithelial cells are specifically labelled, we  
 107     cloned the 5-kb upstream sequence of zebrafish *charon* (Fig.1a, Supplementary Fig.1).  
 108     A previous transient promoter assay demonstrated that the upstream sequence of  
 109     zebrafish *charon* drives the reporter expression around KV (Gourronc et al., 2007), but  
 110     any stable transgenic line using the *charon* promoter has yet to be established. After  
 111     confirming the previous report by the Tol2-mediated EGFP reporter assay  
 112     (Supplementary Fig.3a), we established three stable transgenic lines in which either  
 113     EGFP, Lck-mGreenLantern (mGL) or H2B-mEosEM (a nuclear-localizing form of a  
 114     photoconvertible fluorescent protein mEosEM; Fu et al., 2020) expression is driven by  
 115     the *charon* 5-kb promoter (Fig.1b, Supplementary Fig.4a). In all the lines established,  
 116     reporter gene expression was specifically detected in KV-epithelial cells (Fig.1c-e,  
 117     Supplementary Fig.4b, c). In *charon:EGFP* embryos, EGFP fluorescence started to be  
 118     detected from around the 6-somite stage (ss) just like endogenous *charon* (Hashimoto et  
 119     al., 2004), and became stronger as KV grows in size. DAB (3,3'-Diaminobenzidine,  
 120     tetrahydrochloride) immunohistochemistry against EGFP showed that at 6 ss and 12 ss,  
 121     EGFP expression is strictly limited to the entire KV-epithelial cells with no ectopic



122 expression in adjacent mesoderm (Fig.1d-f). Fluorescence *in situ* hybridization with  
123 immunofluorescence (FISH-IF; He et al., 2020) of *charon* in *charon:EGFP* embryos  
124 further showed that *charon* expression mostly overlaps with that of EGFP at 12 ss  
125 (Fig.1g). However, unlike endogenous *charon*, EGFP expression did not exhibited left-  
126 right bias (Fig.1d-f). This can be explained by the fact that 3' untranslated sequence of  
127 *dand5* (a mouse ortholog of *charon*) is responsible for its right-sided expression  
128 (Minegishi et al., 2021; Nakamura et al., 2012). Untranslated sequences of zebrafish  
129 *charon*, which are not included in the plasmid construct of this study, could have a  
130 similar function to that of mouse *dand5*.

131 Furthermore, we found that the activity of upstream sequences of *charon* in KV-  
132 epithelial cells is conserved among teleosts. A transgenic medaka (*Olyzias latipes*),  
133 which was established with the upstream sequence of medaka *charon* (Supplementary  
134 Fig.2), exhibited EGFP-reporter expression in KV-epithelial cells from 4 ss with faint  
135 ectopic expression in the notochord (Supplementary Fig.5c). Overall, these results show  
136 that *charon* transgenic lines are best suitable for the study of development and function  
137 of KV-epithelial cells.

138

# 139 KVDCs differentiate into mesodermal lineages

140 KV is a transient organ and starts to degenerate at mid-somite stages (14–16 ss) when  
 141 asymmetric *nodal* expression is established in the LPM (Cooper and D’Amico, 1996;  
 142 Long, 2003; Supplementary Fig.8). However, we observed that EGFP-expressing cells  
 143 in *charon:EGFP* embryos survived after KV-collapse and even persisted in hatched  
 144 larvae (Supplementary Fig.3). Hereafter we refer to the EGFP-positive cells in  
 145 *charon:EGFP* after KV-collapse as “KV-epithelium-derived cells (KVDCs)” to  
 146 distinguish them from KV-epithelial cells. To track KVDCs after KV-collapse, we  
 147 histologically analyzed embryos at the mid-somite stage (22 ss) and larvae at 3 days  
 148 post fertilization (dpf) using DAB immunohistochemistry and confocal microscopy. In  
 149 22-ss embryos whose KVs have already diminished, most KVDCs were clustered  
 150 around the collapsed lumen, but some of them were found in the adjacent notochord and  
 151 presomitic mesoderm (PSM; Fig.2a, b). In 3-dpf hatched larvae, KVDCs were broadly  
 152 distributed in the region posterior to the cloaca where no endodermal tissue exists  
 153 (Fig.2c). KVDCs were detected in mesodermal tissues including both segmented and  
 154 unsegmented posterior-most somites (Moriyama et al., 2012; Fig.2c, e1, e2), notochord  
 155 cells near the posterior end and the notochordal sheath in the more anterior side (Fig.2d,  
 156 e3), and fin mesenchymal cells with radial filopodia especially in the caudal fin fold

157 (Fig.2c, d and e4). We counted the number of KVDCs in each tissues using  
158 *charon:H2B-mEosEM* 3-dpf larvae and found that they were most abundant in the  
159 unsegmented posterior-most somites ( $56 \pm 11$  cells/embryo; Fig.2f). In contrast, no  
160 KVDCs were observed in the ectoderm (Fig.2d, e).

161 To further support the above findings, we directly examined the migration of  
162 KVDCs into these mesodermal tissues by a photoconversion-based method (Shimada et  
163 al., 2013). We photoconverted H2B-mEosEM transiently expressed in KV-epithelial  
164 cells of  *$\beta$ actin:memCherry* embryos, whose cell membrane is labelled with mCherry  
165 (Xiong et al., 2014). After photoconversion at around 13 ss, labelled KV-epithelial cells  
166 were tracked at an interval of 1 hour during segmentation periods (n = 4 embryos,  
167 Fig.2g). At 14 ss (0 hour after photobleaching), photoconverted H2B-mEosEM was  
168 only detected in KV-epithelial cells, confirming the specificity of photoconverted  
169 labelling (Fig.2h). The labelled KVDCs tended to stay together until 19 ss (4 hours after  
170 photobleaching), and then gradually migrated from KV into the PSM and notochord  
171 (Fig.2h, arrowheads in the 28-ss panel). When the same embryos were further observed  
172 at 2 dpf, the labelled KVDCs were broadly distributed in segmented somites,  
173 unsegmented posterior-most somites, and the notochord (Fig.2h, arrowheads in the 2-  
174 dpf panel). We obtained a similar result using another transgenic line, *foxj1a:KikGR*, in

175 which photoconvertible protein KikGR (Tsutsui et al., 2005) is expressed in KV-  
176 epithelial cells as well as in the floor plate (Caron et al., 2012; Supplementary Fig.7a).  
177 Taken together, the results demonstrated that KVDCs migrate and contribute to the axial  
178 and paraxial mesoderm.

179

# 180 Loss of the LRO and epithelial character in KVDCs

181 We next examined the molecular characteristics of KVDCs after KV-collapse. We first  
182 examined whether any KVDCs are eliminated by apoptosis during and after KV-  
183 collapse. Immunostaining of cleaved caspase-3, an executioner of apoptotic process  
184 (Elmore, 2007), revealed that apoptosis was induced in KVDCs after KV-collapse, but  
185 that the number of apoptotic KVDCs was limited (Fig.3a, b). We then asked how  
186 survived KVDCs lost morphological and molecular characteristics of the LRO  
187 components by examining *charon* (LRO marker) and *sox17* (DFCs marker) expression  
188 and the protein distribution of ZO-1 (epithelial marker) and acetylated  $\alpha$ -tubulin  
189 (primary cilia marker) in KVDCs (Alexander and Stainier, 1999; Essner et al., 2005;  
190 Hashimoto et al., 2004; Oteíza et al., 2008). FISH-IF showed that the expression of  
191 *charon* was diminished at 20 ss and 26 ss compared to at 12 ss, and *charon*-negative  
192 KVDCs were frequently detected (Fig.3c). Moreover, we did not detect *sox17*

193 expression in KV-epithelial cells or KVDCS at all stages examined (Supplementary  
194 Fig.6), which is consistent with the previous report (Alexander and Stainier, 1999).

195 ZO-1 was accumulated on the surface of the KV lumen at 6 ss, confirming the  
196 epithelial character of EGFP-positive cells in *charon:EGFP* (Fig.3d; Oteíza et al., 2008).

197 At 18 ss, shortly after KV-collapse, migrating KVDCs no longer expressed ZO-1,  
198 although residual ZO-1 expression was detected in a cluster of KVDCs located on the  
199 ventral side of the CNH. At 26 ss, a substantial number of KVDCs moved to the  
200 posterior edge of the chordoneural hinge (CNH), a group of progenitors which are  
201 located at the posterior end of the notochord and thought to give rise to the notochord,  
202 floor plate and hypochord (Agathon et al., 2003; Row et al., 2015). Furthermore,  
203 primary cilia of KVDCs were largely diminished after KV-collapse, particularly in  
204 migrating ones (Fig.3e). Taken together, the results suggest that KV-epithelial cells  
205 gradually lose their LRO and epithelial character, and acquire mesodermal fates through  
206 mid-to late somite stages.

207

208 KVDCs undergo EMT at the onset of migration

209 We examined detailed cellular behavior of KVDCs at the onset of migration using a  
210 double transgenic line, *charon:EGFP;βactin:memCherry*. KV initially protruded into

211 the yolk, then incorporated into the tailbud at around 10 ss, and finally collapsed  
212 (Supplementary Figure 8). At around 14 ss, KV-epithelial cells detached from the  
213 underlying yolk syncytial layer (YSL) (Fig.4, Supplementary Video 1). Interestingly, a  
214 ring-like structure labelled by strong mCherry signals appeared in the YSL just beneath  
215 KV (Fig. 4, magenta arrowheads). This YSL ring shrank when KV was detached from  
216 the YSL as if it pushes KV out into the tailbud and breaks the connection between KV  
217 and the YSL. Once KV was detached from the YSL, its lumen started to shrink (Fig. 4,  
218 the 01:20 panel). At the same time, KV-epithelial cells started to disperse and migrate,  
219 extending filopodia-like structures (Fig. 4, insets in the 02:40 panel, Supplementary  
220 Video 2). This observation, together with the loss of ZO-1 expression (Fig.3d), suggests  
221 that KV-epithelial cells undergo epithelial-mesenchymal transition during KV-collapse.

222

## 223 Differentiation of KVDCs into the PSM and somite derivatives

224 We next examined the developmental capacity of KVDCs which migrate into somites  
225 using lineage-specific differentiation markers. At 12 ss when KV is still present, KV  
226 epithelial cells were ventrally attached to the PSM as well as notochord (Fig.5a). A pan-  
227 PSM marker *msgn1* (Joseph and Cassetta, 1999; Yoo et al., 2003; Yoon et al., 2000) was  
228 strongly expressed in the PSM but not in KV-epithelial cells at 12 ss (Fig.5a),

229 confirming their distinct lineages. After KV-collapse, KVDCs were found in the PSM  
230 (Fig.5b1) and later in the anterior segmented somites as well, where *msgn1* expression  
231 is no longer detected (Fig.5b2). These results suggest that KVDCs are incorporated into  
232 the PSM after KV-collapse and are intermingled with surrounding PSM cells.

233 The zebrafish somite consists of three populations with distinct fates, the  
234 myotome, dermomyotome, and sclerotome (Stickney et al., 2000). The myotome is  
235 further divided into the two subpopulations, slow muscle in the dorsal (outer), and fast  
236 muscle in the ventral (deeper) regions. KVDCs were found to be distributed in all these  
237 populations at later stages (Fig.5). At 3 dpf, KVDCs which are located near the surface  
238 and in the deep layer of the myotome expressed slow and fast muscle markers,  
239 respectively, as detected by F59 and F310 antibodies (Fig.5c, d). These muscle cells  
240 persisted at least until 5 dpf (data not shown), suggesting that they differentiated into  
241 functional muscles. Fast muscles are known to be derived from adaxial cells which are  
242 large, cuboidal in shape, located adjacent to the notochord and express *myoD* (Devoto et  
243 al., 1996). During slow muscle development, adaxial cells radially migrate from their  
244 original position toward the superficial layer of the myotome and differentiate into slow  
245 muscles there (Barresi et al., 2001; Cortés et al., 2003). At late somite stage (26 ss), we  
246 identified adaxial cell-like KVDCs, judged by their shape and location, and found that

247 they indeed expressed *myoD* (Fig.5h). This observation suggests that KVDCs follow the  
248 normal developmental process to differentiate into slow muscles.

249 KVDCs were also found in the dermomyotome layer (the outer-most surface of  
250 the somite) and in the sclerotome region (the ventro-medial region near the notochord  
251 and neural tube), where they expressed the dermomyotome marker, Pax3/7 (Hammond  
252 et al., 2007) and sclerotome marker, *nkx3.1* (Ma et al., 2018), respectively (Fig.5e, i).

253 We also examined the positional relationship between ventral KVDCs and posterior  
254 blood vessels, because the ventral sclerotome is known to differentiate into mural cells,  
255 which surround blood vessels (Stratman et al., 2017). For this, we used double  
256 transgenic fish of *charon:EGFP* and *drl:mCherry*, whose LPM derivatives are specifically  
257 labelled with mCherry (Mosimann et al., 2015; Prummel et al., 2019). We found that  
258 phalloidin-negative KVDCs were attached to the posterior-most part of the caudal vein  
259 (Fig.5f, g), supporting the idea that KVDCs acquire the differentiation potency of the  
260 sclerotome. Importantly, KVDCs did not overlap with mCherry-expressing LPM-  
261 derivatives, indicating that they do not contribute to the LPM lineage (Fig.5f, g).

262

263 Differentiation of KVDCs into the notochord and tail mesenchyme

264 We further examined the differentiation process of KVDCs in the notochord and tail



mesenchyme. At 12 ss, KV-epithelial cells were ventrally attached to the *no tail* (*ntl*, the young notochord marker)-positive notochord (Schulte-Merker et al., 1994; Fig.6a). At 20 ss, some KVDCs were found in the posterior end of *ntl*-expressing area, i.e., the CNH (Fig.6b). These KVDCs were also positive for *ntl*, indicating that they had acquired the axial mesodermal fate. Some KVDCs further developed into *ntl*-negative mature notochord cells at 26 ss (Fig.6b), and later into the surrounding sheath cells (Fig.2d). These results show that KVDCs which infiltrate into the CNH possess the full capacity of notochord differentiation.

The migration of KVDCs into the axial mesoderm seemed to take place exclusively in the CNH. The developing and mature notochord is surrounded by the basement membrane formed by deposition of extracellular matrix (ECM) such as Laminin and Fibronectin (Scott and Stemple, 2004). However, accumulation of these two major ECM components was reduced around the CNH as indicated by immunostaining (Fig.6d, e), which may facilitate cell mingling and infiltration of KVDCs into the CNH.

Lastly, we tracked the fate of the posterior-most KVDCs cluster which stays around the CNH until the end of the segmentation period (Fig.3d). We found that these KVDCs are distinguished from CNH cells, because they did not express the CNH

283 markers, *noto* and (Dheen et al., 1999; Fig.6c). Using *charon:H2B-mEosEM*, we  
 284 examined the fate of these KVDCs by photoconverting H2B-mEosEM-expressing cells  
 285 located posterior to the CNH at around 28 ss and chased the labelled cells in 2 dpf  
 286 larvae. The result demonstrated that they preferentially differentiated into fin  
 287 mesenchymal cells in the caudal fin fold rather than into the CNH or notochord cells (n  
 288 = 3 embryos, Fig.6f). These results imply that these KVDCs occupy a posterior-most  
 289 part of the paraxial (but not the axial) mesoderm and directly differentiate into caudal  
 290 fin mesenchyme.

291

## 292 Discussion

293 During differentiation, the potency of cells becomes restricted as they are specified into  
294 certain lineages. In some contexts, however, differentiated cells can be converted to  
295 other cell types; a phenomenon called adult cell plasticity (Merrell and Stanger, 2016).  
296 Such plasticity is often observed in the regeneration process, but it is still a matter of  
297 debate whether it takes place commonly during normal development of animals  
298 (Merrell and Stanger, 2016). The present study demonstrated that derivatives of KV-  
299 epithelial cells (KVDCs) join mesodermal progenitors after KV-collapse and  
300 differentiate into mature cell types according to their location. Such “reemployment” of  
301 KV-epithelial cells is a rare example of cell plasticity of fully differentiated cells during  
302 normal development in vertebrates, which is achieved through transdifferentiation  
303 (Fig.7).

304  
305 KVDCs are a multipotent mesodermal cell population in the tailbud  
306 Our results revealed that KVDCs in the zebrafish tailbud possess unique differentiation  
307 potency. The zebrafish tailbud contains three undifferentiated cell populations, the PSM,  
308 CNH, and neuromesodermal progenitors (NMPs; Beck, 2015; Sambasivan and  
309 Steventon, 2021). KVDCs occupy a part of the PSM and CNH, and differentiate into the  
310 paraxial and axial mesoderm. In contrast, KVDCs never contribute to NMPs as they do

311 not give rise to the neural tube (Henrique et al., 2015). Importantly, KVDCs are unique  
312 among these progenitors in the tailbud in that they are the descendants of functional  
313 epithelial cells with primary cilia, which exerted a crucial role in left-right patterning.

314       The contribution of the LRO cells to the mesodermal tissues could be a common  
315 feature among vertebrates, although the origin and structures of the LRO are diverse  
316 (Blum et al., 2014). The gastrocoel roof plate in amphibians and node in mammals,  
317 which function as the LRO in these species (Blum et al., 2014), are suggested to  
318 differentiate into the notochord and somites, and into the posterior notochord,  
319 respectively (Brennan et al., 2002; Shook et al., 2004). Thus, it is likely that the  
320 vertebrate LRO cells generally behave as mesodermal cells at later stages, although  
321 DFCs in the zebrafish are transiently endodermal at the beginning of their emergence  
322 (Alexander and Stainier, 1999).

323

## 324 Transdifferentiation of KVDCs

325 Transdifferentiation of mature cells is generally achieved through dedifferentiation into  
326 a potent state followed by redifferentiation into a new lineage (Jopling et al., 2011). The  
327 development of KVDCs appears to go through this process: KVDCs redifferentiate into  
328 somite-derivatives and notochord after being integrated into their progenitors. We  
329 observed that KV-epithelial cells undergo EMT during KV-collapse. EMT frequently

occurs in association with dedifferentiation as seen in cancer metastasis and neural crest delamination (Yang and Weinberg, 2008). Indeed, EMT in KV is accompanied by the loss of differentiated epithelial characters such as primary cilia and tight junctions, which lead to KV-collapse and cell migration. Factors triggering this EMT are yet to be determined, although potent signalling ligands, Wnt, BMP and FGF are produced in the nearby PSM (Hubaud and Pourquié, 2014; Row and Kimelman, 2009). Furthermore, we described the shrinkage of the YSL underlying KV in the present study (Fig.4c). This shrinkage might generate mechanical force which triggers EMT in cooperation with those signalling ligands (Gjorevski et al., 2012).

In general, mature epithelial cells maintain their fate and integrity by cell-cell junctions and attachment to the basement membrane (Yang et al., 2020). Then, why can KV-epithelial cells undergo transdifferentiation and what makes them so unique? Despite the presence of evident apico-basal polarity and cell-cell junctions, KV epithelium seems to lack the basement membrane, as revealed by our immunostaining and a previous report on the atypical localization of Laminin  $\beta$ 1a to their apical side (Hochgreb-Hägele et al., 2013). Thus, KV-epithelial cells may not be of typical epithelium in character, which could reflect their transient function. Lack of the basement membrane would allow KV-epithelial cells to dedifferentiate and migrate

348 without a need of ECM remodelling.

349           Some vertebrate tissues consist of cells derived from different lineages. The  
350 prominent examples are the zebrafish pituitary and mammalian vascular endothelium,  
351 where undifferentiated cells from different origins converge at the transcription level  
352 once they are intermingled (Fabian et al., 2020; Plein et al., 2018). We confirmed here  
353 that KVDCs, whose origin is distinct from the authentic mesoderm, differentiate into the  
354 notochord and somite-derivatives in the caudal region. KVDCs are thus a good model  
355 for the study of such lineage convergence during normal development. Single-cell  
356 multiomics using *charon* transgenic lines will provide insights into the mechanism of  
357 how and to what extent cells from different lineages converge together to form a  
358 functionally integrated tissue.

359

## 360 **Figure legends**

361 **Figure 1.** Establishment of *charon:EGFP* for the specific labeling of KV-epithelial  
362 cells

363 **a**, Location of the 5-kb *charon* promoter in the zebrafish genome. *charon* resides on  
364 chromosome 1, and the 5-kb *charon* promoter spans from the direct upstream position  
365 of its start codon.

366 **b**, Construction of *charon:EGFP* transgene flanked by Tol2 excision sites.

367 **c**, Lateral view of the EGFP fluorescence in a *charon:EGFP* embryo at 9 somite stage  
368 (ss). Fluorescence image was merged with the DIC (differential interference contrast)  
369 image. KV, Kupffer's vesicle.

370 **d**, Dorsal view of a *charon:Lck-mGL* embryo at 9 ss injected with H2B-mCherry  
371 mRNA. Black arrowhead indicates the level of the sagittal optical section on the right  
372 side.

373 **e**, Dorsal view of a DAB-stained *charon:EGFP* embryo at 12 ss.

374 **f**, Cross section of the tailbud of a DAB-stained *charon:EGFP* embryo at 12 ss. Nuclei  
375 were counterstained with hematoxylin. Dorsal side to the top.

376 **g**, FISH-IF of *charon* in a *charon:EGFP* embryo at 12 ss. Magenta signal is for FISH of  
377 *charon* mRNA whereas green is for immunostaining of EGFP proteins. Lateral view of

the tailbud region is shown. White box indicates the enlarged area. Dorsal to the bottom,  
posterior to the left. Scale bars, 200  $\mu$ m (c, e), 100  $\mu$ m (f) and 50  $\mu$ m (d, h).

## Figure 2. Histology of KVDCs

**a**, Lateral view of a DAB-stained *charon:EGFP* embryo at 22 ss. White arrowheads  
indicate KVDCs which have started to migrate.

**b**, Cross section of the tailbud of a DAB-stained *charon:EGFP* embryo at 22 ss. Nuclei  
were counterstained with hematoxylin. Dorsal side to the top. PSM, presomitic  
mesoderm. nc, notochord.

**c**, Lateral view of a *charon:EGFP* embryo at 22 ss counterstained with phalloidin and  
DAPI. Dorsal to the top. Green arrowheads indicate EGFP-positive cells in the CNH  
(chordoneural hinge).

**d**, Cross sections of a DAB-stained *charon:EGFP* larva at 3 dpf. Nuclei were  
counterstained with hematoxylin. Dorsal side to the top. Asterisk indicates a melanocyte.  
dmu, dorsal muscle. fm, fin mesenchyme. nc, notochord. ncs, notochordal sheath. nt,  
neural tube. vmc, ventral muscle.

**e**, Lateral view of the caudal region of a *charon:EGFP* embryo at 3 dpf counterstained  
with phalloidin. White boxes indicate areas magnified in the panels 1-4. White dashed



396 line indicates the edge of the fin fold. Panel 1, EGFP-positive muscles in segmented  
397 somites. Panel 2, EGFP-positive muscles in non-segmented somites. Panel 3, EGFP-  
398 positive notochord cells. Panel 4, EGFP-positive fin mesenchymal cells in the caudal fin  
399 fold. Scale bars, 200  $\mu$ m (a, e), 100  $\mu$ m (b, d), 50  $\mu$ m (c).

400 **f**, Number of H2B-mEosEM-positive KVDCs in *charon:H2B-mEosEM* in four  
401 populations shown in (e). Horizontal bars, mean. Vertical bars, standard deviation. N =  
402 20 larvae.

403 **g**, Scheme for the labelling of KV-epithelial cells by photoconversion. H2B-mEosEM is  
404 expressed in KV-epithelial cells in  *$\beta$ actin:memCherry* embryos by injection of  
405 *charon:H2B-mEosEM* plasmid. H2B-mEosEM was photoconverted at around 13 ss  
406 using a confocal microscopy and time-lapse images were taken every 1 hour.

407 **h**, Time-lapse images of a  *$\beta$ actin:memCherry* embryo injected with *charon:H2B-*  
408 *mEosEM*. Images taken every 2 hours after photoconversion and from 2 dpf treated  
409 larvae are shown. Arrowheads indicate the migrated KVDCs labelled with  
410 photoconverted H2B-mEosEM.

411

412 **Figure 3. Loss of the LRO character in KVDCs**

413 **a**, Immunostaining of cleaved caspase-3 in *charon:EGFP* embryos at 12, 20 and 26 ss.

414 Top, the signal of cleaved caspase-3. Bottom, merged view with EGFP and DAPI signal.

415 Magenta arrowheads indicate KVDCs which is positive for cleaved caspase-3.

416 **b**, Quantification of cleaved caspase-3-positive KVDCs. Horizontal bars, mean. Vertical

417 bars, standard deviation. *p*-values from two-tailed Welch's t-test are shown. N = 9 (12

418 ss), 11 (20 ss), and 10 (26 ss) embryos.

419 **c**, FISH-IF of *charon* in *charon:EGFP* at 20 and 26 ss. Magenta, signal of FISH for

420 *charon* mRNA. Green, signal of immunostaining for EGFP. Lateral view of the tailbud

421 region is shown. Dorsal to the top.

422 **d**, Immunostaining of ZO-1 in *charon:EGFP*. KV is shown for 6 ss whereas the tail

423 region is shown for 18 and 26 ss. Magenta and white arrowheads indicate KVDCs with

424 and without ZO-1 expression, respectively. nc, notochord. CNH, chordoneural hinge.

425 **e**, Immunostaining of acetylated  $\alpha$ -tubulin in *charon:EGFP*. Magenta and white

426 arrowheads indicate KVDCs with and without acetylated  $\alpha$ -tubulin signal, respectively.

427 Scale bars, 50  $\mu$ m (a, c, d, e).

428

429 **Figure 4. KVDCs migrate to mesodermal tissues through EMT**

430 Time-lapse images of a *charon:EGFP; $\beta$ actin:memCherry* embryo taken every 20

431 minutes for 3 hours from 13 ss. Magenta arrowheads indicate the shrinkage of the YSL

underlying KV. White boxes in the panel 02:40 indicate inset areas. Green arrowhead in the inset indicates a filopodium-like structure formed in KVDCs. Scale bars, 50  $\mu$ m.

# Figure 5. Differentiation of KVDCs into somite derivatives

**a**, FISH-IF of *msgn1* in a *charon:EGFP* embryo at 12 ss. Left, dorsal view. Top, an optical section at the level of the dashed line in the panel below. Right, a more dorsal stack than the left one. PSM, presomitic mesoderm.

**b**, FISH-IF of *msgn1* in *charon:EGFP* embryos at 20 ss and 26 ss. Left, dorsal view. Anterior to the top. Right, optical sections at the level of the dashed lines in the left panels. White arrowheads indicate KVDCs in the PSM (20 ss and 26 ss) and in the segmented somites (26 ss).

**c, d**, Vibratome cross sections of *charon:EGFP* 3 dpf larvae immunostained with F59 (c) and F310 (d) antibodies to show the distribution of slow and fast muscles, respectively. Counterstaining was performed with DAPI. White arrowheads indicate EGFP-positive slow and fast muscle cells. Dorsal to the top. nt, neural tube. nc, notochord.

**e**, Immunostaining of dermomyotomes by anti-Pax3/7 antibody in a *charon:EGFP* 2 dpf larva. Lateral view and optical sections at the level of dashed lines are shown. White

450 arrowheads indicate EGFP-positive dermomyotomes.

451 **f**, Lateral view of a *charon:EGFP;drl:mCherry* 3 dpf larva. White arrowheads indicate

452 EGFP-positive sclerotomal cells surrounding mCherry-positive cells derived from the

453 LPM. nc, notochord. LPM, lateral plate mesoderm.

454 **g**, Left, cross section of a *charon:EGFP;drl:mCherry* 3 dpf larva immunostained with

455 anti-EGFP and anti-mCherry antibodies. Counterstaining was performed with phalloidin

456 and DAPI. Right, a magnified view of the white rectangular area in the left panel. White

457 arrowheads indicate KVDCs surrounding mCherry-positive LPM derivatives.

458 **h, i**, FISH-IF of *myod1* in a *charon:EGFP* embryo at 26 ss (h) and *nkx3.1* in a 24 hpf

459 (hours post fertilization) embryo (i). Left panel, lateral view. Anterior to the left, dorsal

460 to the top. Right panel, optical sections at the level of the dashed lines in the left panels.

461 White arrowheads indicate KVDCs which differentiated in *myod1*-positive adaxial cells

462 (h) and *nkx3.1*-positive sclerotomes (i). Scale bars, 50  $\mu$ m (a-i).

463

464 **Figure 6. Differentiation of KVDCs into the notochord**

465 **a**, FISH-IF of *ntl* in a *charon:EGFP* embryo at 12 ss. Top, dorsal view. Anterior to the

466 top. Bottom, an optical section at the level of the dashed line in the upper panel. nc,

467 notochord.

468 **b**, FISH-IF of *ntl* in *charon:EGFP* embryos at 20 ss and 26 ss. Dorsal views. Anterior to  
469 the left. White arrowheads, KVDCs in the CNH (20 ss) and in the notochord (26 ss).  
470 CNH, chordoneural hinge.

471 **c, d**, Immunostaining of Laminin (c) and Fibronectin (d) in *charon:EGFP* embryos at  
472 12 ss and 20 ss. For 12 ss, dorsal views of KV are shown. Anterior to the top. For 20ss,  
473 lateral views of the tailbud are shown. Dorsal to the top. Anterior to the right.

474 **e**, FISH-IF of *noto (flh)* in a *charon:EGFP* embryo at 26 ss. Lateral view. Dorsal to the  
475 top. Anterior to the left.

476 **f**, Lineage tracing of the KVDCs cluster at the posterior tip of the CNH. H2B-mEosEM  
477 was expressed in KVDCs by *charon:mEosEM* plasmid injection into *βactin:memCherry*  
478 embryos. Photoconversion was performed in 28 ss and the labelled KVDCs were chased  
479 at 2 dpf. White arrowheads indicate the labelled KVDCs which differentiated into fin  
480 mesenchymal cells in the caudal fin fold. Scale bars, 50 μm (a-f).

481

482 **Figure 7. An overview of KVDCs differentiation**

483 Schematic diagram depicting the process of the transdifferentiation-mediated  
484 reemployment of KV-epithelial cells. After KV-collapse, KV-epithelial cells  
485 dedifferentiate and undergo EMT. Mesenchymalized KVDCs infiltrate into mesodermal

486 progenitors, the PSM and CNH, and acquire new fates according to their new locations.

487 Note that they do not directly migrate to the segmented somites or the mature notochord.

488

489 Supplementary Figure 1. Sequence of the zebrafish 5-kb *charon* promoter

490 Nucleotide sequence of the 5-kb *charon* promoter in the zebrafish.

491

492 Supplementary Figure 2. Sequence of the medaka 5-kb *charon* promoter

493 Nucleotide sequence of the 5-kb *charon* promoter in medaka. Red, partial coding

494 sequences of *charon* gene.

495

496 Supplementary Figure 3. Fluorescence stereomicroscope images of

497 *charon:EGFP*

498 **a**, Lateral view of a *charon:EGFP* embryo at 6 ss.

499 **b**, Ventral view of a *charon:EGFP* embryo at 20 ss .

500 **c**, Lateral view of a *charon:EGFP* larva at 2 dpf. Scale bars, 200  $\mu$ m (a-c).

501

502 Supplementary Figure 4. Fluorescence of *charon:Lck-mGreenLantern*

503 **a**, The construction of *charon:Lck-mGreenLantern* transgene.

504 **b, c**, Lateral view of a *charon:Lck-mGreenLantern* embryo at 8 ss (b) and 22 ss (c). KV,  
505 Kupffer's vesicle. Scale bars, 200  $\mu$ m.

506

507 Supplementary Figure 5. Medaka *charon* promoter is active in medaka KV-  
508 epithelial cells

509 **a**, Location of the *charon* 5-kb promoter in the medaka genome. *charon* resides on  
510 chromosome 1, and the *charon* 5-kb promoter spans from the direct upstream position  
511 of its start codon.

512 **b**, Construction of *Ol\_charon:EGFP* transgene flanked by I-SceI recognition sites.

513 **c**, Expression of EGFP in *Ol\_charon:EGFP* embryos. Lateral views on the top row,  
514 dorsal views on the bottom row. White dot lines indicate embryonic bodies. Red circle  
515 indicates the position of KV. Scale bars, 500  $\mu$ m.

516

517 Supplementary Figure 6. FISH-IF of *sox17* in *charon:EGFP* embryos

518 FISH-IF of *sox17* in *charon:EGFP* embryos at 6 ss, 12 ss, 20 ss and 26 ss. Lateral views  
519 of tailbud regions are shown. Scale bars, 50  $\mu$ m.

520

521     Supplementary Figure 7. *foxj1a:KikGR* supports KV-epithelial cell migration

522     **a**, Scheme for the photoconversion labelling of KV-epithelial cells in *foxj1a:KikGR*.

523     KikGR in KV-epithelial cells was selectively photoconverted at around 13 ss and time-

524     lapse images were taken every 1 hour.

525     **b**, Time-lapse images of a photoconverted *foxj1a:KikGR* embryo. Single stacks from

526     images taken every 2 hours after photoconversion are shown. When photoconverted at

527     around 13 ss, labelled KVDCs migrated into the PSM and the notochord by 28 ss (6

528     hours after photoconversion). Scale bars, 50  $\mu$ m.

529

530     Supplementary Figure 8. Time-lapse imaging of the incorporation of KV into the

531     tailbud

532     Time-lapse imaging of the KV development in a TL2E embryo. Arrowheads indicate

533     the position of KV. Staring from 4 ss, images are taken every 15 minutes for 10 hours.

534     Scale bars, 50  $\mu$ m.

535

536     Supplementary Video 1. Time-lapse imaging of KV-collapse

537     A video showing the process of KV-collapse in a *charon:EGFP; $\beta$ actin:memCherry*

538     embryo. Time-lapse images were taken every 5 minutes for 3 hours from 13 ss. Note



539 that a ring-like structure is formed beneath KV during KV-collapse. Scale bar, 50  $\mu\text{m}$ .

540

541 Supplementary Video 2. Formation of filopodia-like structures in KVDCs

542 Green channel is extracted from Supplementary Video 1 to show the formation of

543 filopodia-like structure in KVDCs. Scale bar, 50  $\mu\text{m}$ .

544

545 **Author Contributions**

546 Conceptualization, T.I., K.I., and H.T.; Methodology, T.I., K.I., and T.K.; Investigation,  
 547 T.I., K.I., and T.K.; Resources, T.I., K.I., and T.K.; Writing - Original Draft, T.I.; Writing  
 548 - Review & Editing, T.I., T.K., and H.T.; Supervision, H.T.; Funding Acquisition, T.I.,  
 549 K.I., T.K. and H.T..

550

551

## 552 **Acknowledgement**

553 We thank S. Megason for *βactin:memCherry* strain; C. Mosimann for *drl:mCherry*  
 554 strain and *drl:EGFP (pCM298)* plasmid; N. H. Patel for Pax3/7 antibody (DP312); A.  
 555 Shimada for technical support and discussion; Y. Yamagishi, S. Tayama, I. Fukuda, M.  
 556 Funato and M. Sakamoto for fish husbandry. This work was supported by Grant-in-Aid  
 557 for Japan Society for the Promotion of Science (JSPS) Fellows under Grant Numbers  
 558 18J21960 (T.I.) and 15J08599 (K.I.), JSPS KAKENHI under Grant Numbers  
 559 JP19K23741 and JP21K15101 (T.K.) and Japan Agency for Medical Research and  
 560 Development (AMED) under Grant Number JP21gm1110007 (H.T.).

561

562

563     **Competing interests**

564

565     **Materials & Correspondence**

566

567

## 568 **Material and Methods**

### 569 Zebrafish strain and manipulation of embryos

570 The RW (RIKEN WT) and TL2E (Tüpfel long fin 2E) strains were used as the wild-  
571 type zebrafish strains. Adult fish and embryos were maintained under standard  
572 conditions. Fertilized embryos were incubated at 23-28°C in 1/3×Ringer's solution  
573 (38.7 mM NaCl, 0.97 mM KCl, 1.67 mM HEPES, 1.80 mM CaCl<sub>2</sub>) to obtain the stage  
574 of interest. For imaging hatched larvae, 0.003% N-phenylthiourea (PTU) was added to  
575 1/3×Ringer's solution during somitogenesis to prevent pigmentation. Staging of  
576 embryos is based on Kimmel et al. (1995). All experimental procedures and animal care  
577 were carried out according to the animal ethics committee of the University of Tokyo  
578 (Approval No. 20-2).

579

### 580 Plasmid construction

581 The sequences of *charon* and *foxj1a* promoters (5 kb and 5.2 kb, respectively) were  
582 amplified from the genomic DNA of the RW strain and were cloned into pCR Blunt II-  
583 TOPO vector (Invitrogen). pDestTol2pA2-*charon:EGFP* (*charon:EGFP* for short) was  
584 constructed by replacing the *drl* promoter in pDestTol2pA2-*drl:EGFP* (Mosimann et al.,  
585 2015) with the cloned *charon* promoter. Medaka *charon* promoter was cloned from

586 genomic DNA of medaka d-rR strain and was inserted into pBlueScript II SK(+)-EGFP  
587 carrying an I-SceI cassette to make pBSSK-I-SceI-*Ol\_charon:EGFP* (*Ol\_charon:EGFP*  
588 for short). pDestTol2pA2-*charon:Lck-mGreenLantern* was constructed as follows: the  
589 CDS of mGreenLantern (Campbell et al., 2020) whose codon usage is optimized for  
590 zebrafish was purchased from Integrated DNA Technologies (IDT), and was inserted  
591 into pCSf107mT vector (Mii et al., 2009) with an N-terminal membrane localization  
592 signal of mouse Lck (Chertkova et al., 2017) to make pCSf107-Lck-mGreenLantern.  
593 Then, the CDS of Lck-mGreenLantern was subcloned into pDestTol2pA2 vector  
594 carrying the *charon* promoter. pDestTol2pA2-*charon:H2B-mEosEM* was constructed as  
595 follows: the CDS of mEosEM was synthesized through mutagenesis of mEos4b (Paez-  
596 Segala et al., 2015) as described (Fu et al., 2020), and was assembled together with the  
597 CDS of human Histone H2B type 1-J (H2BC11) into pCSf107mT to make pCSf107-  
598 H2B-mEosEM. Then, the CDS of H2B-mEosEM was subcloned into pDestTol2pA2  
599 vector carrying the *charon* promoter. To construct template plasmids for the antisense  
600 probe synthesis, full-length coding sequences (CDSs) of zebrafish *charon*, *sox17*, *msgn1*,  
601 *myod1*, *nkx3.1*, *ntl* and *noto* cloned from 16 ss cDNA were inserted into pCSf107mT.  
602 These cloning and subcloning were performed using PrimeSTAR GXL polymerase,  
603 PrimeSTAR MAX polymerase, In-fusion HD kit and In-Fusion Snap Assembly kit

604 (TaKaRa). pRSETa\_mEos4b was a gift from Loren Looger (Addgene plasmid #51073;  
605 <http://n2t.net/addgene:51073>; RRID:Addgene\_51073). Lck-mScarlet-I was a gift from  
606 Dorus Gadella (Addgene plasmid #98821; <http://n2t.net/addgene:98821>;  
607 RRID:Addgene\_98821). Digital plasmid maps are available upon request.

608

## 609 Transgenesis

610 Zebrafish transgenesis was based on the Tol2 transposase method (Kikuta and  
611 Kawakami, 2009). To obtain founders, Tol2 mRNA (25 ng/μL) and plasmids (12.5  
612 ng/μL) were injected into one-cell stage embryos of the RW strain. Founders carrying  
613 transgenes were screened by crossing with the TL2E strain. For medaka transgenesis,  
614 the I-SceI method (Rembold et al., 2006) was used. Following digestion with I-SceI,  
615 *Ol\_charon:EGFP* plasmid was injected into one-cell stage embryos of the d-rR  
616 wildtype strain. Founders were screened by crossing with the d-rR strain. Fluorescence  
617 image of transgenic embryos was captured by M165 FC fluorescence stereomicroscope  
618 and DFC7000T digital camera (Leica).

619

## 620 Time-lapse imaging and photoconversion

621 To perform time-lapse imaging, embryos were mounted laterally in the chamber of 1%

622 agarose in 1/3×Ringer's solution with their left side down. Embryos were imaged by  
623 LSM710 confocal microscopy (Carl Zeiss) from 13 ss for 3 hours or longer at an  
624 interval of 5 min. In cell-tracking experiments, the photoconversion of H2B-mEosEM  
625 was performed with a 405 nm diode laser at the power of 10%. After photoconversion,  
626 embryos were released in 1/3x Ringer's solution with 0.003% PTU and were grown  
627 until they reach the stages of interest in a shaded chamber. The 3D rendering of time-  
628 lapse images was performed with Imaris (version 8.1.2, Bitplane).

629

## 630 Histology and immunostaining

631 Embryos were fixed with 4% paraformaldehyde (PFA) in PBST at 4°C overnight or at  
632 room temperature for 2 hours, washed with PBST for three times and were stored at 4°C  
633 until use (except for Laminin and Fibronectin, see below). Fixed embryos were  
634 permeabilized with 1% Triton X-100 in PBS, blocked with 2% BSA in PBSDT  
635 (PBS/1% DMSO/0.1% Triton X-100) and were immunostained with following  
636 antibodies: mouse monoclonal anti-GFP (1/100, A-11120, Invitrogen), rabbit poly-  
637 clonal anti-GFP (1/800, 632592, Clontech), anti-Myosin heavy chain (1/10, F59,  
638 deposited to the DSHB by Stockdale, F.E.), anti-Myosin light chain 1 slow and 3 fast  
639 (1/10, F310, deposited to the DSHB by Stockdale, F.E.), anti-Pax3/7 (1/500, DP312, by



640 courtesy of N. H. Patel), anti-DsRed (1/500, 632496, Clontech), anti-cleaved caspase-3  
641 (1/500, 9661, Cell Signaling Technology), anti-phospho Histone H3 (1/500, 06-570,  
642 Merck), and anti-ZO-1 (1/50, 33-9100, Invitrogen). For immunostaining of Laminin and  
643 Fibronectin, embryos were fixed by 2% PFA for 2 hours at 25°C, then for overnight at  
644 4°C. After quenching PFA with 50 mM glycine in PBSTT (PBS/0.5% Triton X-  
645 100/0.5% Tween 20) and subsequent washing, embryos were blocked with 5% BSA in  
646 PBSTT, and were stained with anti-Laminin (1/100, L9393, Sigma-Aldrich) or anti-  
647 Fibronectin (1/100, F3648, Sigma-Aldrich). Secondary antibodies for  
648 immunofluorescence were anti-rabbit IgG labelled with Alexa Fluor 488, 555, or 568  
649 (A11008, A21429 or A10042, Invitrogen) and anti-mouse IgG labelled with Alexa Fluor  
650 488 or 568 (A11001 or A10037, Invitrogen). For counterstaining, Phalloidin (labelled  
651 with Rhodamine or Alexa Fluor 647) (R415 or A22287, Invitrogen) and DAPI (4',6-  
652 diamidino-2-phenylindole) were added to the secondary antibody solution. Stained  
653 embryos were mounted with 1% LMP agarose/PBS (16520-050, Invitrogen) in a glass-  
654 based dish (3911-035, Iwaki) and were imaged by LSM710 confocal microscopy (Carl  
655 Zeiss). 40× and 25× water-immersion objective lenses (LD C-Apochromat 40x/1.1 W  
656 Korr M27 and LD LCI Plan-Apochromat 25x/0.8 Imm Corr DIC M27, Carl Zeiss) and  
657 a 5× objective lens (EC Plan-Neofluar 5x/0.16) were used. The contrast adjustment and

658 cropping of captured images were performed by Fiji (version 1.53c; Schindelin et al.,  
659 2012).

660 For immunostaining of cross sections in 3 dpf larvae of *charon:EGFP*, fixed  
661 specimens were embedded in 4% LMP agarose/PBS, and 100-200  $\mu$ m sections were  
662 prepared using Vibratome 3000 Tissue Sectioning System. Free-floating sections were  
663 stained with appropriate antibodies and mounted with 50% Glycerol/PBS on a slide  
664 glass.

665 For DAB staining of EGFP-expressing cells, fixed *charon:EGFP* embryos  
666 were blocked with 0.3% H<sub>2</sub>O<sub>2</sub> for 30 min and with 2% BSA in PBST for 2 hours,  
667 stained with anti-GFP antibody (1/800, 632592, Clontech) and biotinylated anti-rabbit  
668 IgG (1/200, BA-1000, Vector Laboratories). VECTASTAIN® Elite® ABC Kit (Vector  
669 Laboratories) and DAB tablets (D5905, Sigma-Aldrich) were used for DAB  
670 chromogenic reaction. Stained embryos were embedded in Technovit 7100 resin (Kulzer  
671 Technique) and 5  $\mu$ m sections were obtained using an RM2245 microtome (Leica).  
672 Sections were counterstained with Mayer's hematoxylin solution and images were  
673 captured by BX61 microscope (Olympus) and AxioCam MRc 5 camera (Carl Zeiss)  
674 using a 40 $\times$  objective lens.

675

676 Fluorescence *in situ* hybridization and immunofluorescence (FISH-IF)

677 *charon:EGFP* embryos at stages of interest were processed according to He et al.,

678 (2020) with minor modifications. Briefly, fixed embryos were permeabilized with 1%

679 Triton X-100 in PBS for 1 hour and were hybridized with DIG-labelled probes at 60°C.

680 Chromogenic reaction was performed with either TSA Plus Cyanine 3 Kit (Akoya

681 Biosciences) for *nkx3.1* or ImmPACT Vector Red (Vector Laboratories) for the other

682 genes. Afterward, embryos were subjected to immunostaining against EGFP using anti-

683 GFP antibody (1/500, A11122, Invitrogen).

684

## 685    **References**

- 686    **Agathon, A., Thisse, C. and Thisse, B.** (2003). The molecular nature of the zebrafish  
687    tail organizer. *Nature* **424**, 448–452.
- 688    **Alexander, J. and Stainier, D. Y. R.** (1999). A molecular pathway leading to  
689    endoderm formation in zebrafish. *Curr. Biol.* **9**, 1147–1157.
- 690    **Alexander, J., Rothenberg, M., Henry, G. L. and Stainier, D. Y. R.** (1999). casanova  
691    plays an early and essential role in endoderm formation in zebrafish. *Dev. Biol.*  
692    **215**, 343–357.
- 693    **Amack, J. D.** (2021). Cellular dynamics of EMT: lessons from live in vivo imaging of  
694    embryonic development. *Cell Commun. Signal.* **19**, 1–16.
- 695    **Amack, J. D., Wang, X. and Yost, H. J.** (2007). Two T-box genes play independent  
696    and cooperative roles to regulate morphogenesis of ciliated Kupffer’s vesicle in  
697    zebrafish. *Dev. Biol.* **310**, 196–210.
- 698    **Barresi, M. J. F., D’Angelo, J. A., Hernández, L. P. and Devoto, S. H.** (2001).  
699    Distinct mechanisms regulate slow-muscle development. *Curr. Biol.* **11**, 1432–  
700    1438.
- 701    **Beck, C. W.** (2015). Development of the vertebrate tailbud. *Wiley Interdiscip. Rev. Dev.*  
702    *Biol.* **4**, 33–44.

- 703 **Blum, M., Feistel, K., Thumberger, T. and Schweickert, A.** (2014). The evolution  
704 and conservation of left-right patterning mechanisms. *Development* **141**, 1603–  
705 1613.
- 706 **Brennan, J., Norris, D. P. and Robertson, E. J.** (2002). Nodal activity in the node  
707 governs left-right asymmetry. *Genes Dev.* **16**, 2339–2344.
- 708 **Brummett, A. R. and Dumont, J. N.** (1978). Kupffer's vesicle in Fundulus  
709 heteroclitus: A scanning and transmission electron microscope study. *Tissue Cell*  
710 **10**, 11–22.
- 711 **Campbell, B. C., Nabel, E. M., Murdock, M. H., Lao-Peregrin, C., Tsoulfas, P.,**  
712 **Blackmore, M. G., Lee, F. S., Liston, C., Morishita, H. and Petsko, G. A.**  
713 (2020). mGreenLantern: a bright monomeric fluorescent protein with rapid  
714 expression and cell filling properties for neuronal imaging. *Proc. Natl. Acad. Sci.*  
715 *U. S. A.* **117**, 30710–30721.
- 716 **Caron, A., Xu, X. and Lin, X.** (2012). Wnt/ $\beta$ -catenin signaling directly regulates Foxj1  
717 expression and ciliogenesis in zebrafish Kupffer's vesicle. *Development* **139**, 514–  
718 524.
- 719 **Chen, Y. Y., Harris, M. P., Levesque, M. P., Nüsslein-Volhard, C. and Sonawane,**  
720 **M.** (2012). Heterogeneity across the dorso-ventral axis in zebrafish EVL is

721 regulated by a novel module consisting of sox, snail1a and max genes. *Mech. Dev.*  
722 **129**, 13–23.

723 **Chertkova, A. O., Mastop, M., Postma, M., van Bommel, N., van der Niet, S.,**  
724 **Batenburg, K. L., Joosen, L., Gadella, T. W. J., Okada, Y. and Goedhart, J.**  
725 (2017). Robust and Bright Genetically Encoded Fluorescent Markers for  
726 Highlighting Structures and Compartments in Mammalian Cells. *bioRxiv*.

727 **Compagnon, J., Barone, V., Rajshekar, S., Kottmeier, R., Pranjic-Ferscha, K.,**  
728 **Behrndt, M. and Heisenberg, C. P.** (2014). The notochord breaks bilateral  
729 symmetry by controlling cell shapes in the zebrafish laterality organ. *Dev. Cell* **31**,  
730 774–783.

731 **Cooper, M. S. and D’Amico, L. A.** (1996). A cluster of noninvoluting endocytic cells  
732 at the margin of the zebrafish blastoderm marks the site of embryonic shield  
733 formation. *Dev. Biol.* **180**, 184–198.

734 **Cortés, F., Daggett, D., Bryson-Richardson, R. J., Neyt, C., Maule, J., Gautier, P.,**  
735 **Hollway, G. E., Keenan, D. and Currie, P. D.** (2003). Cadherin-mediated  
736 differential cell adhesion controls slow muscle cell migration in the developing  
737 zebrafish myotome. *Dev. Cell* **5**, 865–876.

738 **Devoto, S. H., Melançon, E., Eisen, J. S. and Westerfield, M.** (1996). Identification

739 of separate slow and fast muscle precursor cells in vivo, prior to somite formation.

740 *Development* **122**, 3371–3380.

741 **Dheen, T., Sleptsova-Friedrich, I., Xu, Y., Clark, M., Lehrach, H., Gong, Z. and**

742 **Korzh, V.** (1999). Zebrafish *tbx-c* functions during formation of midline structures.

743 *Development* **126**, 2703–2713.

744 **Du, S. J. and Dienhart, M.** (2001). Zebrafish *tiggy-winkle* hedgehog promoter directs

745 notochord and floor plate green fluorescence protein expression in transgenic

746 zebrafish embryos. *Dev. Dyn.* **222**, 655–666.

747 **Elmore, S.** (2007). Apoptosis: A Review of Programmed Cell Death. *Toxicol. Pathol.*

748 **35**, 495–516.

749 **Essner, J. J., Amack, J. D., Nyholm, M. K., Harris, E. B. and Yost, H. J.** (2005).

750 Kupffer’s vesicle is a ciliated organ of asymmetry in the zebrafish embryo that

751 initiates left-right development of the brain, heart and gut. *Development* **132**,

752 1247–1260.

753 **Fabian, P., Tseng, K., Smeeton, J., Lancman, J. J., Dong, P. D. S., Cerny, R. and**

754 **Crump, J. G.** (2020). Lineage analysis reveals an endodermal contribution to the

755 vertebrate pituitary. *Science (80-. ).* **370**, 463–467.

756 **Fu, Z., Peng, D., Zhang, M., Xue, F., Zhang, R., He, W., Xu, T. and Xu, P.** (2020).

- 757 mEosEM withstands osmium staining and Epon embedding for super-resolution  
758 CLEM. *Nat. Methods* **17**, 55–58.
- 759 **Gjorevski, N., Boghaert, E. and Nelson, C. M.** (2012). Regulation of Epithelial-  
760 Mesenchymal Transition by Transmission of Mechanical Stress through Epithelial  
761 Tissues. *Cancer Microenviron.* **5**, 29–38.
- 762 **Gourronc, F., Ahmad, N., Nedza, N., Eggleston, T. and Rebagliati, M.** (2007).  
763 Nodal activity around Kupffer’s vesicle depends on the T-box transcription factors  
764 notail and spadetail and on Notch signaling. *Dev. Dyn.* **236**, 2131–2146.
- 765 **Hammond, C. L., Hinits, Y., Osborn, D. P. S., Minchin, J. E. N., Tettamanti, G.**  
766 **and Hughes, S. M.** (2007). Signals and myogenic regulatory factors restrict pax3  
767 and pax7 expression to dermomyotome-like tissue in zebrafish. *Dev. Biol.* **302**,  
768 504–521.
- 769 **Hashimoto, H., Rebagliati, M., Ahmad, N., Muraoka, O., Kurokawa, T., Hibi, M.**  
770 **and Suzuki, T.** (2004). The Cerberus/Dan-family protein Charon is a negative  
771 regulator of Nodal signaling during left-right patterning in zebrafish. *Development*  
772 **131**, 1741–1753.
- 773 **He, J., Mo, D., Chen, J. and Luo, L.** (2020). Combined whole-mount fluorescence in  
774 situ hybridization and antibody staining in zebrafish embryos and larvae. *Nat.*



- 775        *Protoc.* **15**, 3361–3379.
- 776        **Henrique, D., Abranches, E., Verrier, L. and Storey, K. G.** (2015).
- 777        Neuromesodermal progenitors and the making of the spinal cord. *Development* **142**,
- 778        2864–2875.
- 779        **Hochgreb-Hägele, T., Yin, C., Koo, D. E. S., Bronner, M. E. and Stainier, D. Y. R.**
- 780        (2013). Laminin  $\beta$ 1a controls distinct steps during the establishment of digestive
- 781        organ laterality. *Development* **140**, 2734–2745.
- 782        **Hojo, M., Takashima, S., Kobayashi, D., Sumeragi, A., Shimada, A., Tsukahara, T.,**
- 783        **Yokoi, H., Narita, T., Jindo, T., Kage, T., et al.** (2007). Right-elevated
- 784        expression of charon is regulated by fluid flow in medaka Kupffer’s vesicle. *Dev.*
- 785        *Growth Differ.* **49**, 395–405.
- 786        **Hubaud, A. and Pourquié, O.** (2014). Signalling dynamics in vertebrate segmentation.
- 787        *Nat. Rev. Mol. Cell Biol.* **15**, 709–721.
- 788        **Jopling, C., Boue, S. and Belmonte, J. C. I.** (2011). Dedifferentiation,
- 789        transdifferentiation and reprogramming: three routes to regeneration. *Nat. Rev. Mol.*
- 790        *Cell Biol.* **12**, 79–89.
- 791        **Joseph, E. M. and Cassetta, L. A.** (1999). Mespo: a novel basic helix-loop-helix gene
- 792        expressed in the presomitic mesoderm and posterior tailbud of *Xenopus* embryos.

793       *Mech. Dev.* **82**, 191–194.

794       **Kikuchi, Y., Agathon, A., Alexander, J., Thisse, C., Waldron, S., Yelon, D., Thisse,**  
795       **B. and Stainier, D. Y. R.** (2001). casanova encodes a novel Sox-related protein  
796       necessary and sufficient for early endoderm formation in zebrafish. *Genes Dev.* **15**,  
797       1493–1505.

798       **Kikuta, H. and Kawakami, K.** (2009). Transient and Stable Transgenesis Using Tol2  
799       Transposon Vectors. In *Zebrafish: Methods and Protocols* (ed. Lieschke, G. J.),  
800       Oates, A. C.), and Kawakami, K.), pp. 69–84. Totowa, NJ: Humana Press.

801       **Kimmel, C. B., Ballard, W. W., Kimmel, S. R., Ullmann, B. and Schilling, T. F.**  
802       (1995). Stages of embryonic development of the zebrafish. *Dev. Dyn.* **203**, 253–  
803       310.

804       **Kupffer, C.** (1868). Beobachtungen fiber die Entwicklung. *Anatomie* 209–272.

805       **Long, S., Ahmad, N. and Rebagliati, M.** (2003). The zebrafish nodal-related gene  
806       southpaw is required for visceral and diencephalic left-right asymmetry.  
807       *Development* **130**, 2303–2316.

808       **Lopes, S. S., Lourenço, R., Pacheco, L., Moreno, N., Kreiling, J. and Saúde, L.**  
809       (2010). Notch signalling regulates left-right asymmetry through ciliary length  
810       control. *Development* **137**, 3625–3632.

811 **Ma, R. C., Jacobs, C. T., Sharma, P., Kocha, K. M. and Huang, P.** (2018).  
812 Stereotypic generation of axial tenocytes from bipartite sclerotome domains in  
813 zebrafish. *PLoS Genet.* **14**, 1–29.

814 **Marques, S., Borges, A. C., Silva, A. C., Freitas, S., Cordenonsi, M. and Belo, J. A.**  
815 (2004). The activity of the Nodal antagonist Cerl-2 in the mouse node is required  
816 for correct L/R body axis. *Genes Dev.* **18**, 2342–2347.

817 **Matsui, T., Ishikawa, H. and Bessho, Y.** (2015). Cell collectivity regulation within  
818 migrating cell cluster during Kupffer’s vesicle formation in zebrafish. *Front. Cell*  
819 *Dev. Biol.* **3**, 27.

820 **Melby, A. E., Warga, R. M. and Kimmel, C. B.** (1996). Specification of cell fates at  
821 the dorsal margin of the zebrafish gastrula. *Development* **122**, 2225–2237.

822 **Merrell, A. J. and Stanger, B. Z.** (2016). Adult cell plasticity in vivo: De-  
823 differentiation and transdifferentiation are back in style. *Nat. Rev. Mol. Cell Biol.*  
824 **17**, 413–425.

825 **Minegishi, K., Rothé, B., Komatsu, K. R., Ono, H., Ikawa, Y., Nishimura, H.,**  
826 **Katoh, T. A., Kajikawa, E., Sai, X., Miyashita, E., et al.** (2021). Fluid flow-  
827 induced left-right asymmetric decay of Dand5 mRNA in the mouse embryo  
828 requires a Biccl-Ccr4 RNA degradation complex. *Nat. Commun.* **12**, 4071.

829 **Mizoguchi, T., Verkade, H., Heath, J. K., Kuroiwa, A. and Kikuchi, Y.** (2008).  
830 Sdf1/Cxcr4 signaling controls the dorsal migration of endodermal cells during  
831 zebrafish gastrulation. *Development* **135**, 2521–2529.

832 **Molina, G. A., Watkins, S. C. and Tsang, M.** (2007). Generation of FGF reporter  
833 transgenic zebrafish and their utility in chemical screens. *BMC Dev. Biol.* **7**, 1–14.

834 **Montague, T. G., Gagnon, J. A. and Schier, A. F.** (2018). Conserved regulation of  
835 Nodal-mediated left-right patterning in zebrafish and mouse. *Development* **145**,  
836 dev171090.

837 **Moriyama, Y., Kawanishi, T., Nakamura, R., Tsukahara, T., Sumiyama, K., Suster,**  
838 **M. L., Kawakami, K., Toyoda, A., Fujiyama, A., Yasuoka, Y., et al.** (2012).  
839 The medaka *zic1/zic4* mutant provides molecular insights into teleost caudal fin  
840 evolution. *Curr. Biol.* **22**, 601–607.

841 **Mosimann, C., Panáková, D., Werdich, A. A., Musso, G., Burger, A., Lawson, K.**  
842 **L., Carr, L. A., Nevis, K. R., Sabeh, M. K., Zhou, Y., et al.** (2015). Chamber  
843 identity programs drive early functional partitioning of the heart. *Nat. Commun.* **6**,  
844 8146.

845 **Nakamura, T., Saito, D., Kawasumi, A., Shinohara, K., Asai, Y., Takaoka, K.,**  
846 **Dong, F., Takamatsu, A., Belo, J. A., Mochizuki, A., et al.** (2012). Fluid flow

847 and interlinked feedback loops establish left–right asymmetric decay of Cerl2  
848 mRNA. *Nat. Commun.* **3**, 1322.

849 **Oteíza, P., Köppen, M., Concha, M. L. and Heisenberg, C. P.** (2008). Origin and  
850 shaping of the laterality organ in zebrafish. *Development* **135**, 2807–2813.

851 **Paez-Segala, M. G., Sun, M. G., Shtengel, G., Viswanathan, S., Baird, M. A.,**  
852 **Macklin, J. J., Patel, R., Allen, J. R., Howe, E. S., Piszczek, G., et al.** (2015).  
853 Fixation-resistant photoactivatable fluorescent proteins for CLEM. *Nat. Methods*  
854 **12**, 215–218.

855 **Plein, A., Fantin, A., Denti, L., Pollard, J. W. and Ruhrberg, C.** (2018). Erythro-  
856 myeloid progenitors contribute endothelial cells to blood vessels. *Nature* **562**, 223–  
857 228.

858 **Prummel, K. D., Hess, C., Nieuwenhuize, S., Parker, H. J., Rogers, K. W.,**  
859 **Kozmikova, I., Racioppi, C., Brombacher, E. C., Czarkwiani, A., Knapp, D.,**  
860 **et al.** (2019). A conserved regulatory program initiates lateral plate mesoderm  
861 emergence across chordates. *Nat. Commun.* **10**, 1–15.

862 **Rembold, M., Lahiri, K., Foulkes, N. S. and Wittbrodt, J.** (2006). Transgenesis in  
863 fish: Efficient selection of transgenic fish by co-injection with a fluorescent  
864 reporter construct. *Nat. Protoc.* **1**, 1133–1139.

865 **Row, R. H. and Kimelman, D.** (2009). Bmp inhibition is necessary for post-  
866 gastrulation patterning and morphogenesis of the zebrafish tailbud. *Dev. Biol.* **329**,  
867 55–63.

868 **Row, R. H., Tsotras, S. R., Goto, H. and Martin, B. L.** (2015). The zebrafish tailbud  
869 contains two independent populations of midline progenitor cells that maintain  
870 long-term germ layer plasticity and differentiate based on local signaling cues.  
871 *Development* **143**, 244–254.

872 **Sakaguchi, T., Kikuchi, Y., Kuroiwa, A., Takeda, H. and Stainier, D. Y. R.** (2006).  
873 The yolk syncytial layer regulates myocardial migration by influencing  
874 extracellular matrix assembly in zebrafish. *Development* **133**, 4063–4072.

875 **Sambasivan, R. and Steventon, B.** (2021). Neuromesodermal Progenitors: A Basis for  
876 Robust Axial Patterning in Development and Evolution. *Front. Cell Dev. Biol.* **8**,  
877 1–9.

878 **Schindelin, J., Arganda-Carreras, I., Frise, E., Kaynig, V., Longair, M., Pietzsch,**  
879 **T., Preibisch, S., Rueden, C., Saalfeld, S., Schmid, B., et al.** (2012). Fiji: An  
880 open-source platform for biological-image analysis. *Nat. Methods* **9**, 676–682.

881 **Schulte-Merker, S., van Eeden, F. J., Halpern, M. E., Kimmel, C. B. and Nusslein-**  
882 **Volhard, C.** (1994). no tail (ntl) is the zebrafish homologue of the mouse T

- 883 (Brachyury) gene. *Development* **120**, 1009–1015.
- 884 **Scott, A. and Stemple, D. L.** (2004). Zebrafish Notochordal Basement Membrane:
- 885 Signaling and Structure. *Curr. Top. Dev. Biol.* **65**, 229–253.
- 886 **Shimada, A., Kawanishi, T., Kaneko, T., Yoshihara, H., Yano, T., Inohaya, K.,**
- 887 **Kinoshita, M., Kamei, Y., Tamura, K. and Takeda, H.** (2013). Trunk
- 888 exoskeleton in teleosts is mesodermal in origin. *Nat. Commun.* **4**, 1638–1639.
- 889 **Shook, D. R., Majer, C. and Keller, R.** (2004). Pattern and morphogenesis of
- 890 presumptive superficial mesoderm in two closely related species, *Xenopus laevis*
- 891 and *Xenopus tropicalis*. *Dev. Biol.* **270**, 163–185.
- 892 **Stickney, H. L., Barresi, M. J. F. and Devoto, S. H.** (2000). Somite development in
- 893 Zebrafish. *Dev. Dyn.* **219**, 287–303.
- 894 **Stratman, A. N., Pezoa, S. A., Farrelly, O. M., Castranova, D., Dye, L. E., Butler,**
- 895 **M. G., Sidik, H., Talbot, W. S. and Weinstein, B. M.** (2017). Mural-Endothelial
- 896 cell-cell interactions stabilize the developing zebrafish dorsal aorta. *Development*
- 897 **144**, 115–127.
- 898 **Tsutsui, H., Karasawa, S., Shimizu, H., Nukina, N. and Miyawaki, A.** (2005). Semi-
- 899 rational engineering of a coral fluorescent protein into an efficient highlighter.
- 900 *EMBO Rep.* **6**, 233–238.

901 **Warga, R. M. and Kane, D. A.** (2018). Wilson cell origin for kupffer's vesicle in the  
902 zebrafish. *Dev. Dyn.* **247**, 1057–1069.

903 **Xiong, F., Ma, W., Hiscock, T. W., Mosaliganti, K. R., Tentner, A. R., Brakke, K.**  
904 **A., Rannou, N., Gelas, A., Souhait, L., Swinburne, I. A., et al.** (2014). Interplay  
905 of cell shape and division orientation promotes robust morphogenesis of  
906 developing epithelia. *Cell* **159**, 415–427.

907 **Yang, J. and Weinberg, R. A.** (2008). Epithelial-Mesenchymal Transition: At the  
908 Crossroads of Development and Tumor Metastasis. *Dev. Cell* **14**, 818–829.

909 **Yang, J., Antin, P., Berx, G., Blanpain, C., Brabletz, T., Bronner, M., Campbell, K.,**  
910 **Cano, A., Casanova, J., Christofori, G., et al.** (2020). Guidelines and definitions  
911 for research on epithelial–mesenchymal transition. *Nat. Rev. Mol. Cell Biol.* **21**,  
912 341–352.

913 **Yoo, K. W., Kim, C. H., Park, H. C., Kim, S. H., Kim, H. S., Hong, S. K., Han, S.,**  
914 **Rhee, M. and Huh, T. L.** (2003). Characterization and expression of a presomitic  
915 mesoderm-specific mespo gene in zebrafish. *Dev. Genes Evol.* **213**, 203–206.

916 **Yoon, J. K., Moon, R. T. and Wold, B.** (2000). The bHLH class protein pMesogenin1  
917 can specify paraxial mesoderm phenotypes. *Dev. Biol.* **222**, 376–391.

918 **Zhang, J., Jiang, Z., Liu, X. and Meng, A.** (2016). Eph-ephrin signaling maintains the



919 boundary of dorsal forerunner cell cluster during morphogenesis of the zebrafish

920 embryonic left-right organizer. *Development* **143**, 2603–2615.

921

# Figure 1

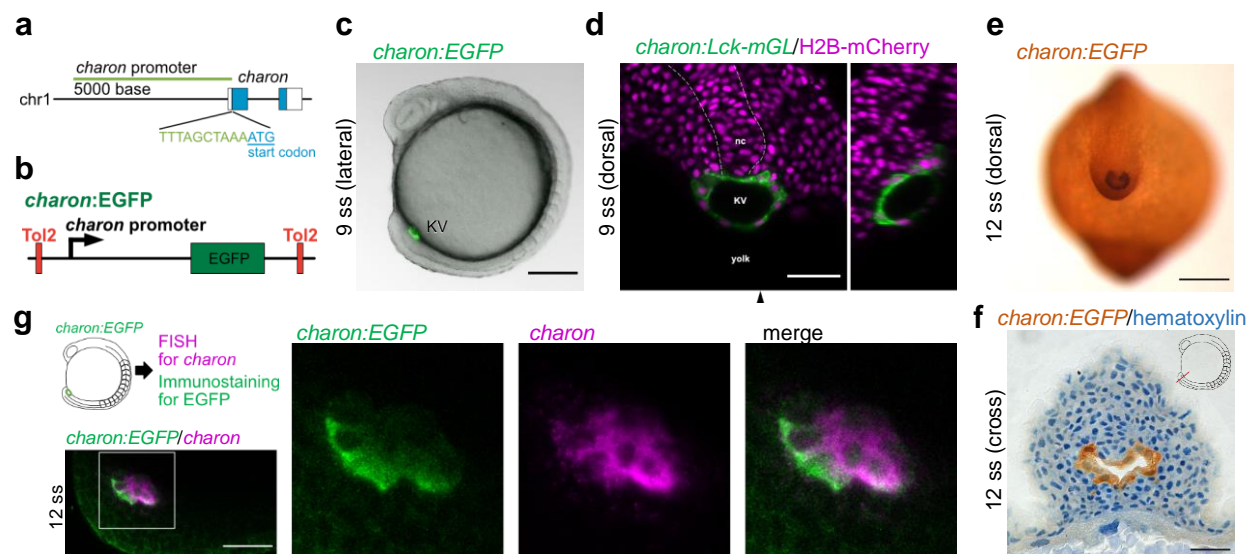

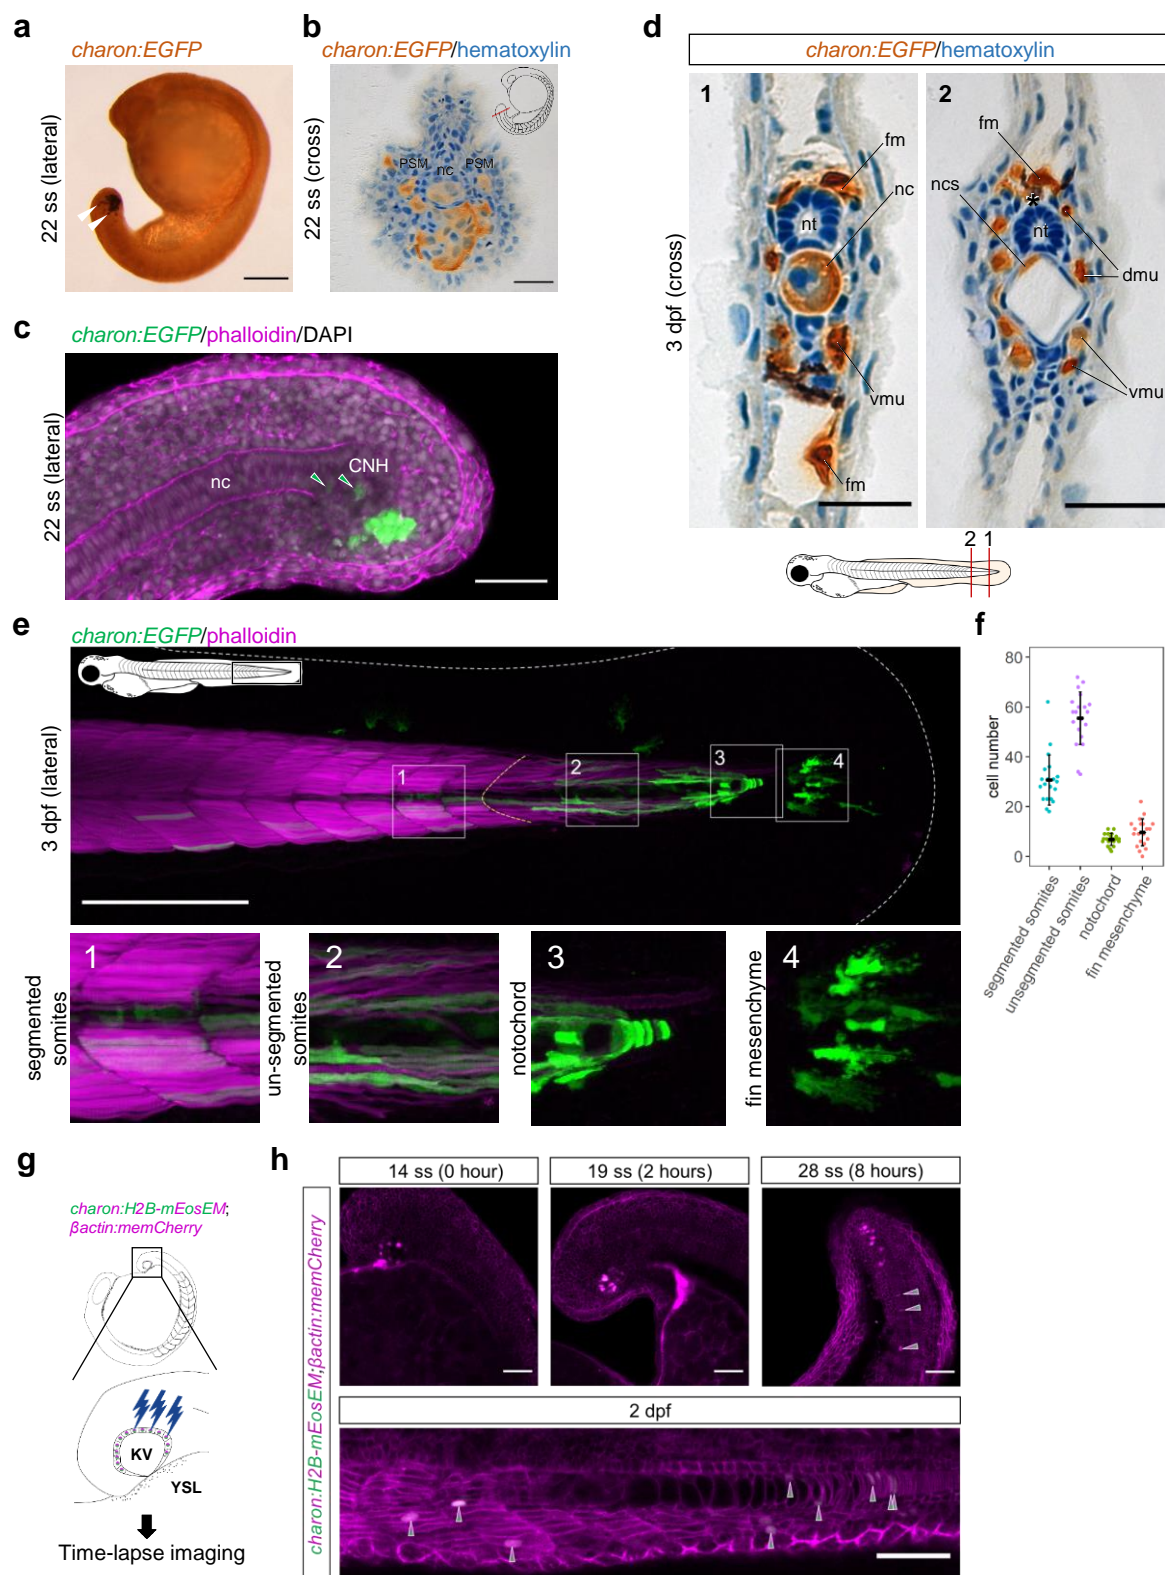

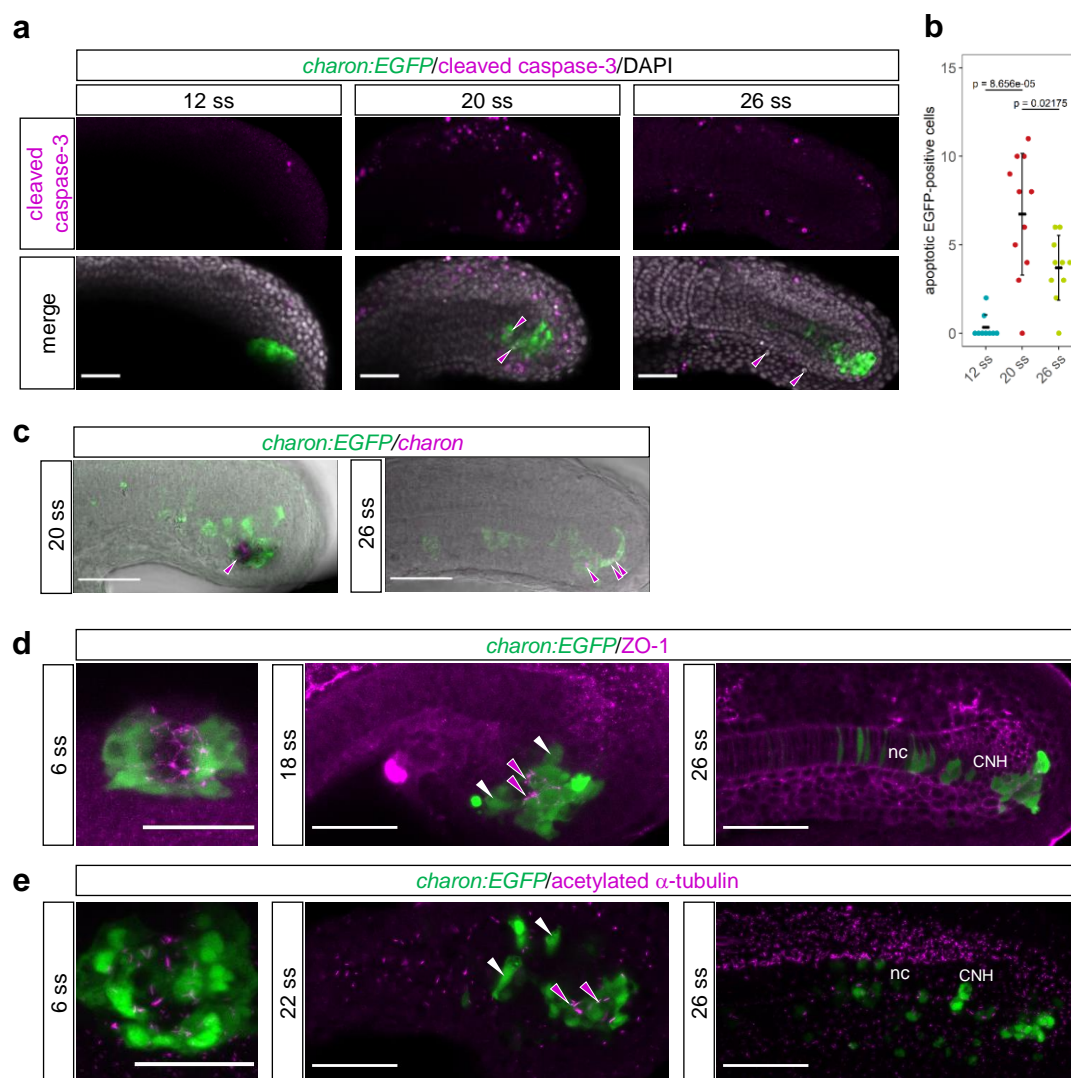

# Figure 4

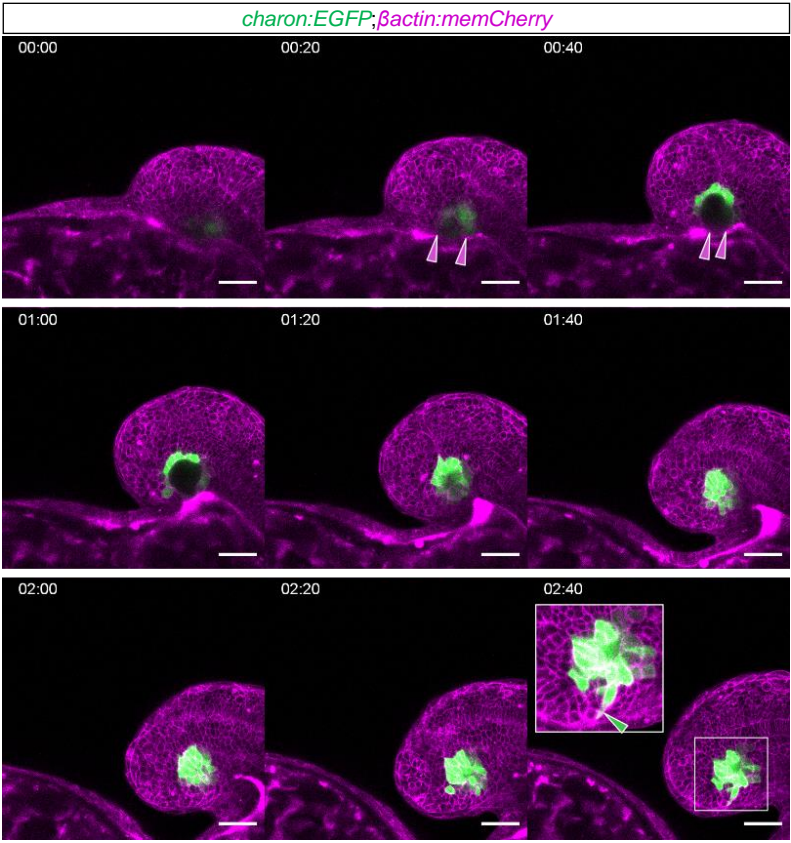



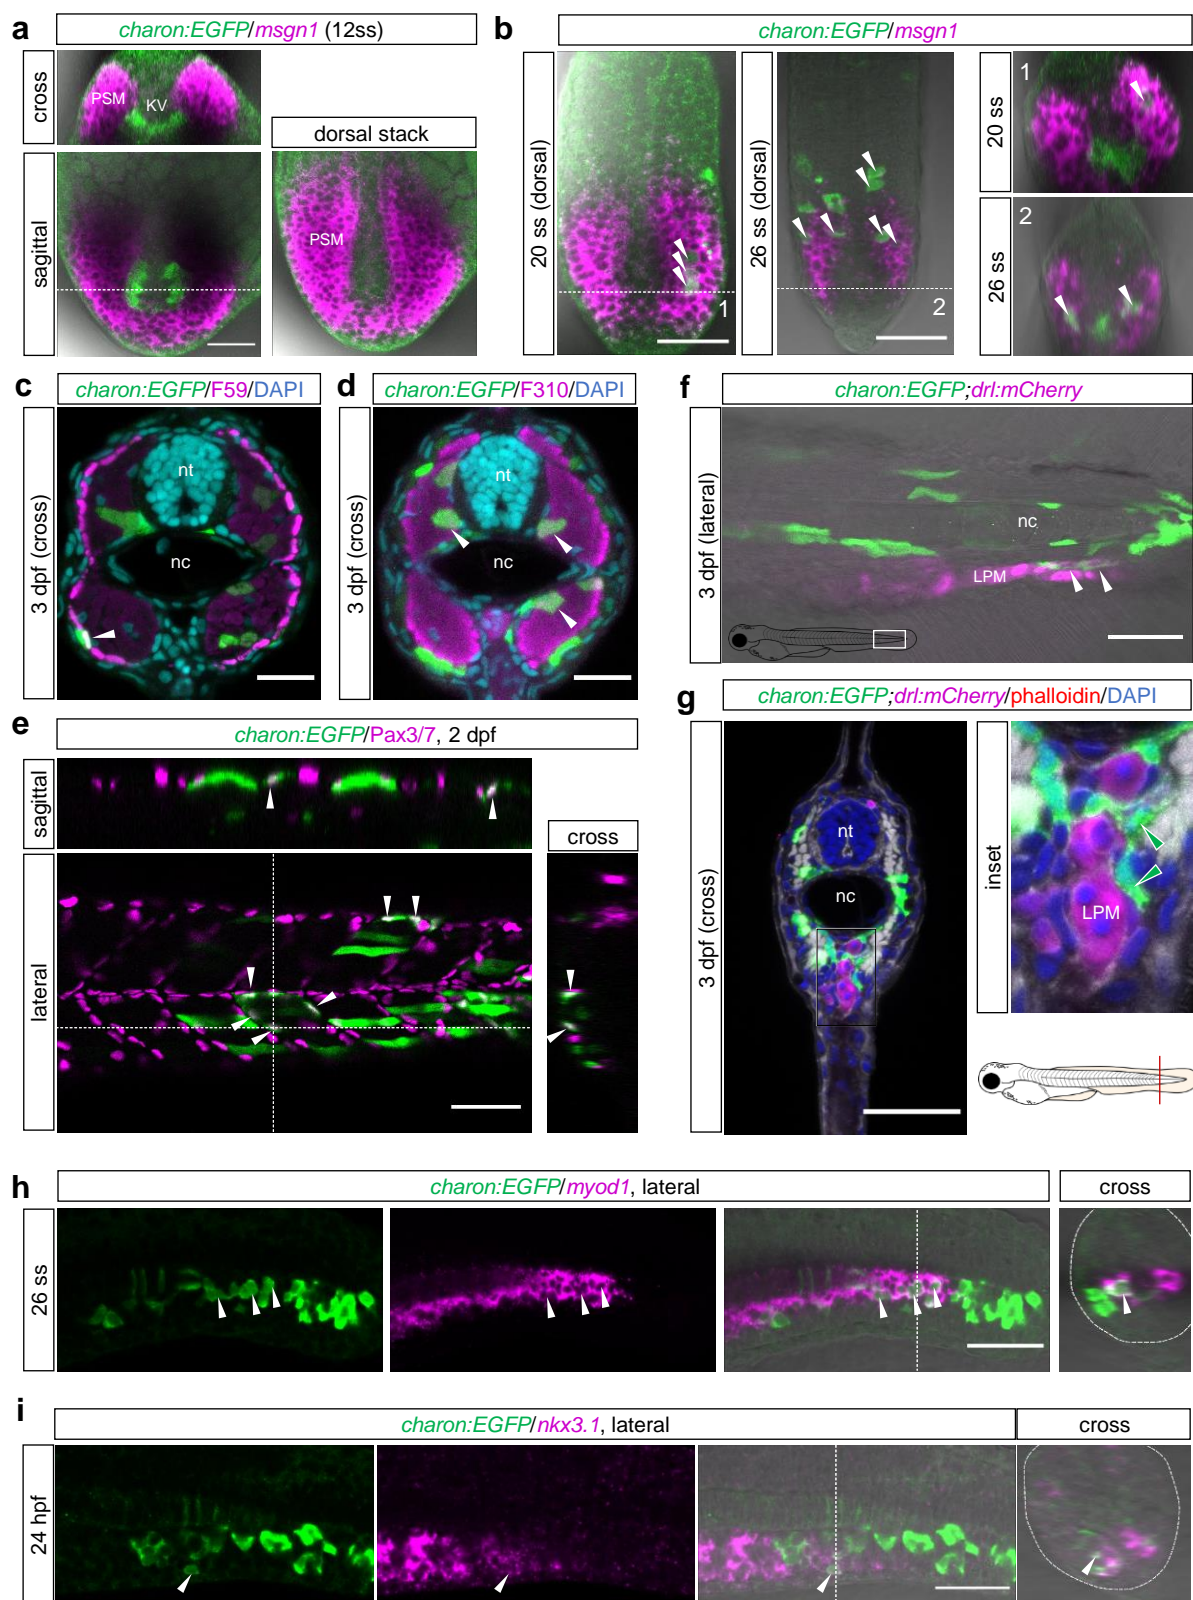

# Figure 6

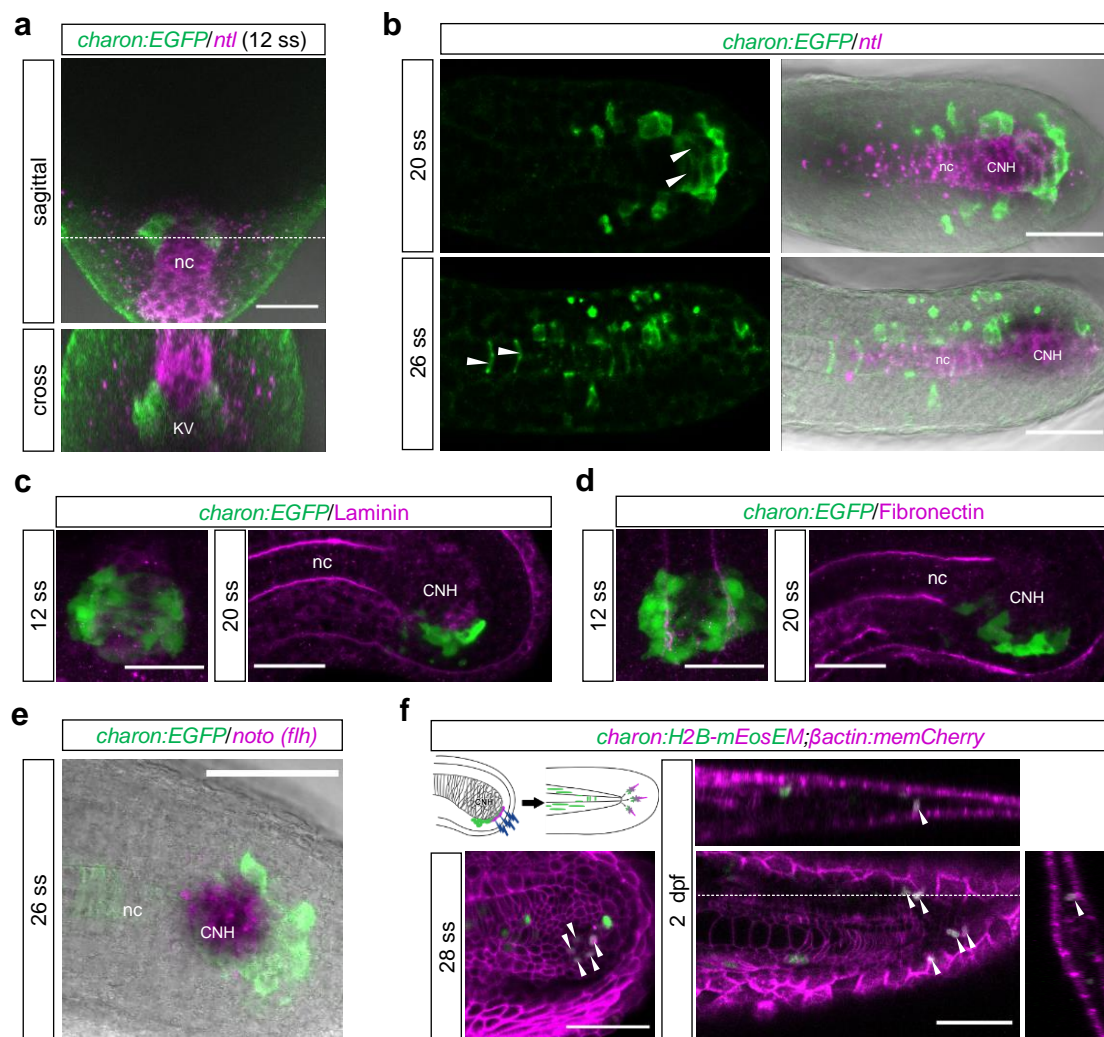

Figure 7

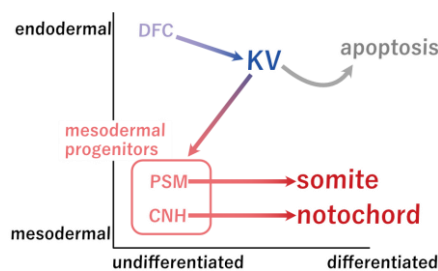



1 AATTCTCGTAGTCTCTTTTTGTGTTCTCTTGTAAGCACCATGAATTTTTCTCACCATATGTGTCCCTGAGCCACAAAACATCTTAGGTTACATATTTG 100  
TAGGAAGAGCCAAAGATATATTTTGATTCAAAATGGCTGATTTTCATTTTTATGGCAAAAACCATTAGAGTGTTAAGACATTTGATATACTGTAATTAGAC  
TATACAAAAACTTTAAAGATGTCTTAAGAATTGCTAGAATCGTACATTTTCAGAAATATGTTAAGTATGTTTTCAGTGTCTTCTGAGGCTCCAATAAATGA  
GACCAAAGTATTATAATAAAAAATTC AACACCCCTTCATATGTTTGTAGACCATTTCAATGGACATCAGGGCAGACCAGTTGTACATCCCAGAACAGTATAGCA  
ACATATAATACAAAAACAAACATACATAAATTGCTGGTATTGACCATATTTCTAAATGGCGAAGTGCGCCTGTTTTCGCGGATGTCTTAGAACTCCGATTCT  
AGTCGCCTTTGGGAGGAATGACTAGGAATAATAAACGGCAAGAACGGTCAAACCTACTTGTCTACAAACAAATGTTTGCATTACTATACAGACCAAGTA  
GAATAATATAACAGGGAAATGT CAGTTTGCACATCAAAACAGCGAAACGAGCAGTTTTTAATGTCTAAAAATGAATGGAAGTGAATGAGACCGGAACCTCT  
CGTGCCAAAAAGATTAAATGGCTGCGCCCGCTCGTCTGCGAAGAATAAGGTGAATAATCTTGAAGTTTATTTTCAGAAATCACAACATTAAACATCGTAA  
CATTTTTACTTTGATTTTGAGGTTTTTGTGGTCTGGAGACCCAACCTGCATGCTCAGACCTGCATGCTCGGACACAGCGTTTCCAGACCTATTGTTAGGGT  
TAGGCATGGGCGGTGTTAGATTCTGATGGTATGATAACCTTGCTTGGATATAAATATCAGCGGTATCGCGGTATGGAGGTTACTGCTCTAATATATATAT 1000  
ATATATTTAAATGTCTGGGTAAAAACAAAACCTATTCCCCCTTTGCACACAATATATTTTAATTTGAGAAACACTTAAATTTTCTGGAACAGTAAACA  
TGTCAGGCTAAATAATTCAATGAATTATTGACTTCTGCTGTCTTCATTAGTTTCAAAAGCACTGAATTAACAAAAAATGTTTTTACAAGTTTGGATATC  
TTTTCTGCTGGAGATACTGCTGTCTTAAAAAAAATGTAATAAAAAAATCTTAGAAAAGGTATAGCAGAAAATGTTGACCGTTTTAAACCTTTGAGTTTT  
CTAAACCCGCGGTATACCTTGAACCTCGTTATCGTCGCATGCCTAGTTAGGGTATCATGTGTTGATTTTGCTACTTGTGTAGAAAGTCCCTCGCTGCAAGTCTG  
TAATCACGATGATGTTAGCACCAAGTCCAAATACATAGTGGACATTGTACCAACCCACTAAGGTAAATGCTCATACTACTGTGATGGATTAGGGTAGGGGGA  
GGTGTAGGCGGATTGTCCATACGTAGTGCAGTGGTCTTCTCGTACAAACATGCTGGATTACCTGATTTGTTGACAAATGGTGTGGATCCATTCCCTTGG  
CAGTTTCATCAGTCCCTCATGGGCGCTTCCCTCGTGGTGTGAGGACCACTGACGTAATGGACCTGGTCCAGTACATCACCAGCTGCTGGCTGCAAGTGAAG  
ACGGTCTCAAAAGTAAAAAATAAATCTCAGAAGTCTGGTCTGCATGTGCAGTTGGGTCTCCGGGCGCTGCAGGTTTCATCTTTAATCCCTCTTTTTTTT  
TTTTTTTTTACATAAAAACTTAAGAATTATTGGCAACATGTCAATAAACTCTGAATAAACTTTGGAATGTGGCTTATGCTGTGCAGGCGCGGATTAA  
GAATTGAGGGCCCCGCGGCACAAATGCTTGTAGGCCCCCTACTGGTCCAACCCCTATTGTTAAATCAAAAAATAAGAACCAACATTTTTAAAAAATAGA 2000  
GTTAATCTATAATGTATTGCCACATTTTAAAAGTAAATGATATACAGTACATATATTTGTAGTCTAAAGAGATTTAACTAATTTTTAAAGCATTTAAAT  
CACACCTCATACTAATAACACAGGGGGAATTAATGAATTTTAATATACGTGTTCAGGTTCACTGAAGCAGTACTAAAATTAATTAGGGGAATTTTAAAT  
ATATAACTTCTACACACTTATAATGCATATGATTGGATATAACACCTCTCCAATCAAGTTCTATGAATCTGAGTCCCTCCATAATACACACACTTATTAA  
TGATTCCCTACTTGTTTGGAGATGAAGAGTAGGCAAAATCTGATATGTAGTGGGGGGAAGAAAAATTTGTTTCATCAGACGGTGGATTCAAACCCGGGTTCAT  
GATCAGGGTCAAAACAAGTTGCCATGCGCTTTACGAGCTACACCACTCACGCTGCTGTTTGAAGCACTCGTTAGTTAGTTGTCTCTGCTCAAGCTCAACTGT  
TATAGTGGAAATCACTAAATTGGCTTATTCCAACGAGGTGCGCTATTTGCGTTGAGCCTAAATAGACACTAAAAAATCTGCACCTACCCCCCTCGCAGGG  
GCCCATGTGTGCACAGGACCCCTGGGCGCTGTGCCCTAATGCCCATGGGTAAATCCGGCCCTGCATCTGTGTCTGGAGTGAATGATGCCATGCTGCTTT  
TCGATGTAGTGGATTTTTTCAAATTTCAAAATCCTAAGCTTTACCTCTATTTGATTGGATGACAATTGTCCACTCTCATGGACTGCAGGCTTTAAATTA  
GATGAATGCTCAGGAACACAAAAACATGAACCTGACTTGTGATGTCCCTTTGTAATGAACACAGGCTCCATGGGGGCAAAATATTGTCCTTACAACCCA  
TAAACAATGAGAACCTTATTTATCTGCTTTAGATTATATGATCTCAATTTGAGAACTTGACCATTTTGACCGGGTTTTGTGGTTCTGGCTCACATG 3000  
TAGAATATCTTTGCCGTGAATAAATGGTAGAGTAGTTTTTGTGACCTTTTGTGTTGCCATTGGGGTGACTGCATTGTTTGTATTGTAGGCCAATGGCT  
CCACCTTGAGGCGTTTTTCAGTAACTGCAAAAAAGAGTAGGCAATGCCGTCCTCAAAATGAGTTCAAGGAAACTCGAGTGAGTATGAATGTTTAAAAACTTA  
TCCAGAAATCCAACGTGAATAAAAGAGCGCATTTATTTTTCTAGTTCACGAGGCAATTTTGGATGTGAGCAGGCATCGCATGGACGAAGGTGCATGG  
CACAGTATGGTATGTGCACAGTGCCTGTCTGGTGTGCATGTGTGTAATCAGTACATTAGCAATATATATACTTATATATTTGTGTCATTTCATAGATAA  
CAGCCTTCAAGCAGATGTGCAGAAATGAAGTGAGAGGATCCAGTCAGCCCCAGTCCTTCTGGCTCAACAGAGACAGTCTGCTACACTCAGAAGGGTCCA  
AACTAATATAAAACGATGAATTTGCTCAAAATCTCGAGTCTGTACATAGCGCCTTGGTGAGACACGAGCTCCACCTGCTGGTTTCTGAATGTATTGCAT  
GCACATATTAGTTTTATCTGTAGTATTTTATTAAGCCGTCGATGCAAAAATATTAGTTTTATTTGGGTTTTGTGTTCTTTTATATACAGTTTTTTGTG  
ATTAATTAATTTTATTTATGTATTGTAAATTAATTTTGATTATTAAATATAGCCTAAACAAAAACAAGACCTCGGGATCACTTGTTTACTCGTAT  
CTTCTTATTTTACATACCCCAAAATTCAGTAAATGTGAGTAAATAAACTGAGGTTTTGCCAAACACTATATATTGTTCTCTGGTATTATTTTTCGGAACAA  
AATTTCATTACATTTCAAGTGTCTGCAGACTCATATGTCATTATAGTTTAACTATTTTGAAGTGCAAAATAAAATTACGCTTTTCATTATTTTACTTAC 4000  
AGAATGATCCCGGTAATAATGCTTTAAATGCATATTACATAAATACTTGGGTCTTTGCGTTTGTGTAATTATCTGTTATATAAACGCGATCCCTCAATTT  
AGCTTAATCTTTTACATCTTTGTCGTTGCTCTTTATAAGTGAAATGAAAGTCTCCTCACTTTGTTGCTCTTTGTTTGGCTTGTCCCTGGGAAAGTGT  
TTCTGTAAGGTCGTAATATGATTACAGGCTTTTGTGCTGAATAGTGTACCTGAAGTTAGGGAAAACCTTCACACCTGAGCTCAACATCTGACTTCAGGTG  
AGAAAAGTCTTCAGTACCGTGAGAAAGACACCTTTGGGCAGCCATAAGTAGTGATTATTTTGTATAATCGTTTTTCATGCTGAAATTAAGATCATTTTATC  
ACCTTATTTAAGGTTATTGTTTTATTGGATAAATAGTCTAATCTTGTCTTGGTAATTGGAGCTATATGTGTTTTATTTTTTGAAGAAATAAGGGGAAAT  
TGCTGAATAGAAATAATTCGTTTCTTGGTCATTCTAGCCTATAGGTGCTTTTTCTTGTGTAATAAAAAATGCTATGTGCTACGATTAAAAATGTAAGCTA  
CTGAAGGGGTACAAAAAGGGTCTGGAATTGCTTTAAAAATATTACGCTAAAAATAAGGACAAAACTCGTTCACGACGATGGTTAAAAAGAGATGAAAG  
GTGCACTTCTACTGCTCACGAAACCTCACCCGTCAGTACATCCATTATTGGCTCTTCTGTGCTTAAACATGTTTCAAACAGCTATATTCACCCCAT  
AATAAAACAATGATGACCATGAAGACCTGTTGAGTATATAATGCTCAGCAATGTGCTCATATACGACGAAGGTGACCGAACGAAACCTTGA 5000  
ACCGCAAGATTTTTCAACAAATAATCGACTATATGTATTTTATAGAGAGAAATAATCCCTCTCTTTTTTTTTTTTTTGTAAAATTCATAATTTAGCTAAA

1 CAAACTACAATCGGCAGGCCAACAGCTCCCTTCTCCACCCCATTCGAGGAATCCGCTTGTA AACACATAAATCCATGCAGCTCTTTGTTTTCTCGTCTG 100  
ACCAAGCATCTGGTTTTAAACTGCAGCTGGATAGCTCTAATATTACTCGCCATTTTGTGTCATTTCCAGTGTTATCTTGGTGTTGTGAAGGGCTGTAAG  
CTAGTGAAGAGAATGTAAGCAGAGAATGTAACCGGAGGAGAGATGGGAAATGAGTGCAGGCTTACTCAGTACCAACAGTCCC GCCCACAAATTCAGAAGT  
GAATTTCCAAATGAAC TACTGCTGCCAGCAGAGAACTATGTCC TAGATAATGACAGTATTTTTTTTTTTTGGNNNNNNNNNTAAAAACAGAAGAACCA  
TAATAAAAAGACCTCTTCTCACAGTGAGAAAGCCCTGGTTGGGATAAAGGCTGGGATGTGCCTTTATGTGTAGAGTTTGCCCTTTCTCCCATGCATGTG  
TGGGTTTTCTACAGTCCAAAGACATGCTCCATAGATTAATGGGTGTCTCTAAATTACCCCTAGTTTGCCCTGAGTGAGTGTTGGCCCTGCAACAGA  
CTGGAGACCTGT CAGGGTGATTTCCGCCATAGTAGCTGGGTTGTCTCAGCAGCCCATGCTCCCAGCAGGGATT CAGCGGGTTCTTAAGATG  
TGATCTTTCTTATTTTTTCTATTTTGCAAACTTCTGAGCATTTAATAAAATAAATGGAATACCTAAAATCTGTCAAAAATCTGTCTAATCTGTCACTTT  
GCTGCTGTTTGGTTTTTCATTATTAAGATCTCTTGATATTACTTTATCTTTACATTTACTAAAAAATGTTTTTTTTCTCGCTTTTTCATGTGCAAAATA  
CATTGAAAACTGAGATGTTCTTGGCACCCAAATGTT CAGAAAATAATTAACACTAAATTTGGAATGCCAAGCGTTTGTGTTTTACGTACATTTCTGTT  
AATTCAGGCTCTCCGTGCTCTCAGCTGGGATTGCTGCACATGTGGCAGCCAAATTAGTGCAGTTAGTTCAGGTAATGAGGTTGGACCTGTGCACTAAAT  
ACTCTCAGTGGGAAGTCAGCTGGATGCAAAATGAACATGTACTTTTCGT CAGTACGGTCTCGCCATATGGTCTTAGTTCAAATATGCCACACAAGGTTAAT  
TTGGTACACTTCATGTAACATTAGCCAGTTCTGACTATGCTGTGCAGTGAGGGTGTGGGGTTATGTTAGAGAGCTGT CATTGCTATGCTGCCAGTATTT  
CATTTGCTTGACTTTGCCATCATCAACTGATAAGACTACATCTTATGGCTGTGATAAAACAGAGACTGCTCTGAATTAAGCATGTGACTGACTGACTT  
GTGTTTTCTCCAGTGAAGTCACGGTGTGCATCCATTTAGGT CACCGAAGGTCTGCCACTTTCATTATCATCTATTTTCCAGAGCTGCATACCTTTTGAA  
AACATTTTTCTAAAGTGGTAGACGGAAGTGATTTATTAATTCACTACGTGAAGATTTTATTTATTTCCAATGCCATAGCTTTAGGTGACACACACAGCTGC  
TTTTTGCTGGTCTGCCAATGTCTATTGTTACTTAGACAACCTAAAAAATGAGTCTCGTTTCCATAAATAGTCTCTCTTTTCCCTGTTTTGTGTTTT  
TTGCTTTTGTGCAGGTGTTTTACATTCAAAGAACTCTTCACTCTGTGACCAATGTCTAAAAACACCTCAATAATTGAATGATAAATGATTTCTTGTGTG  
TTTTTACTTTGGGTTTTCACTGTTTTCTATTTCTCCACTATACACCTTTTTCTCCACAATGCTCTTTGACATATATACACAGCGGGTTGCTCTAAAAAATA  
AAGTTGAAGTCATCTGTTAATAGTTCAC CAGCTAGATAGCAAATCTTCCGTAGTGTGACGCAATTGCGTCATTTTATGACGTGAAAAAATAATGCATTT  
CATT CAGCGTATATTTATGATCTTTTACCTAGGAGAGTAGATTATAGTAAAAAAGGGACCCATAGGTTTGCTTTTAAATTCAAATTCGGCTTTATGT  
GTAGAGCACTTTTTCTACGAACACCTCAAATTTGAGTTACATAAAATAAATAATTAATTTCTAAATAAAGTGTT CATATTAAAGCCCTGAACACA  
CATGTACATTTGTCAAAAAAATAATCCCAATAGTGCATAAAATCAA CTGCAACACGAGGAGATGTTCAAAAAAGTTACTTTAAAGCTAAGCAAATAAGA  
TGAGTTTTTCATTTTTTGGTTAAAGGCCAAAAAATGGAGGCCCTGACCTCCTCAGGCAGGCGGTTCCACAGACGAGACCCAGCGTCTGGAATGAGGCC  
TCACCGTGGGTTTTTGTCTTGAAGACAAATCCTTCTGTTTTGTATTGTACTTTCTTAATGTGGTTTTTGTCTTTTTGCTTTTTTATTTTGTCCCTT  
TGTTTTCTAAACCCTTATATTAACCTTGTTGATGAATGTGCAATAGAAAAATCTCTTGCTGTGTCAATTTTCATTAAATCTGACATCACGGTTTTCCC  
TAAAAATCCAGCTCAAGTGTTAGTTTCTTAACGACATAAATTTGTTCTCGAGGGTCTCCAAGTAACCCATTTTATATATAAAAGAGTCACTGAAGCTG  
AAAGAAAAACAGAAAGGTCTCATGTACTAAATGTCAATTTAACCC TGCCGGAATACTAACACCACAAATGTAACCTTAAGAGTAATGCTCTAAAAA  
ACCAGGTTGGCTTTCAGAACTTACTTTTTCTATGT CAGGAATTGCAAACTTGTA AAAATTTGTTTACCATATTTGACATTTTACAAGGACAATAAAGGCA  
CGAGGATAGCTGCATCCAGAAATGTTTTCATGACGTTTACTGCTTGGAAAAAATAGAAGCATTTTCTTGTTTCCACTTCCAAGTTCAAAGTCTGAGGTT  
AGGAGCATGACTGGTGTTATTTTTATTTTATTTTATTTGATCTGATGTACTATTAAGTAAGTGGGACTCTTGATTGCATTATCAAAGTGACCTAAATC  
CAGTATAACCATTTCCTGTTCTTTAAAAATGTTGCCAACATTTATGTTTTTAAAAATTTCTCAAAACAGTTAATAATTTAAGGGTTTT CATTAGAAGATACACT  
TGTATAAAAAAACA CAATACACCTAATTTCTAAGAGTACATTTTCTAATTGTAATCTCTAGAAAAATTTCTGTTACTGATCAGTTTTTCTCATTTTAGA  
TATTTATTTGATGTAATTTCTACATGT CAGCTGGGCTGTTTAATAATAAGGTTATACAGAAAGCTCAACCAGTCTGTGTGATCTTAATAAATTAATGAA  
ATAAAGAAATGAACGTGTGTATGACTATCACAATGTGTTAGTGTTCAATCGTTTGTA AAAAGTGCCCCCTTGTTGGAGACAAAAAAGCCTTGCTTCCAGAG  
AAAAAGGGCTCTTCACATTAATAATCAATGCTTCATGTGTTTAAAGTGTGGGCTCAGTAGATTACAGATTTTAAACAAATACAATTAATTTAAATACT  
AAACAAATAAAAAATGTAAAAAATTTGTTACAAATTTTTTTTTTAAAGTAAACTAACTCATTTACAGTTGTCTATGCATGAACTTTCATTAAGCTTTCATT  
TTTAAATCTGTGCTGCAAAAAGAAATACAGTTCACTAAATAGATGTATCCACTAACAGCTCATAGTTGATGGTTTGCACACACACTTATATGGTAATTCCT  
ATTAATGTAATTTGAACGTGTAACAATATTTGCATAATTTCTGAGGCTTTTTCTCCAAAAATTTCACTTCACATTTTAAAGATAAATTTCTGTTTTTACCTCAA  
GTCAGGCTCAAGTCCCCCATTTTAAATTTATAGTTTAA CAGTTTAAATCTAATTTTACATTTTAAATAAATGAAGTTTAAATTTGACCATATCCAAGGG  
CTTTGACACATTAACATTTGGCTGGTTTAAATAATGTTGTTTTCATGCTTTTCTTTGAAACAATCACCAAAAATATATCTTCAGTGAAAATAATTTTCCTC  
AGATTCAAAGTAAATCTTGATCTTTCTACAGCTAACTTTAACAAAGCAGTAAGTCTGGGAAACAGAGGAGTGTAACAAGAAAAAAGAGTCTTTGAA  
CACTTTTTGGGTTACACGAGAGTCAAACACTAGTCCCCTTGCAGCATTTGTGAAGCCCGTGTGTGATCATGTGCGGGTGATGGGGCAGAGTGAAGTCTAA  
CGGCATGGTGGCCGGGACTTGAAGCTGCTTGTGGGAATAAATGAACAGGACGCAGCTTGTTTACATAGGAAACATAAACTCATCATTTGCTTTACAATAA  
AAGGTAACAGGAACACTGCCAACAGAGAAGCCAGTTGATTCAACAGCAGGCTTCTGGAATTTGTTCTGAGGAACCTGAGGTGAGGCTGCCAGGA  
GCTCTCAGTTTGTCTTCTGCTCTTTTAAACATGGCTTAAAAAACTATTTATAGTAGCTGATCTGTATTAAAGAGGCAATTAAACAGGAAAAACACCAAT  
TTAACATGTGAAACGCTAAACCTCTGATGCTGAAC TGCAGCAATTTCCATAATCTTAAAGAAAAAACAAGTTTAGTAATTTTCTGAATTTGCTTTGT  
GGAAGTTTGTAGAAACAAAGAAATTAGATTTACCTTTCAGGTATTTTTTTTACGACTGTGTTTACGACACTTACCTGAGACGCACTCTCATCCACACCTA  
AAGTTGTAAGTTTGGTGATGCTGATCCGGTGTGGGAAATGTGACACCTTGTGTCATTAAACGCGGGTGAGAACTGACAGCTTGGGCATAAAAAG  
GATGTCCTCGGGACAACGCTCAAAGCACTGACAGCAAGGTTGCCGTTTGGAGCCTTGACCACAAC CAGCAGAGAGTTTCAGGATTTCTCATTAGTTTCT  
GCATTTATTTCTCATCAAGAC

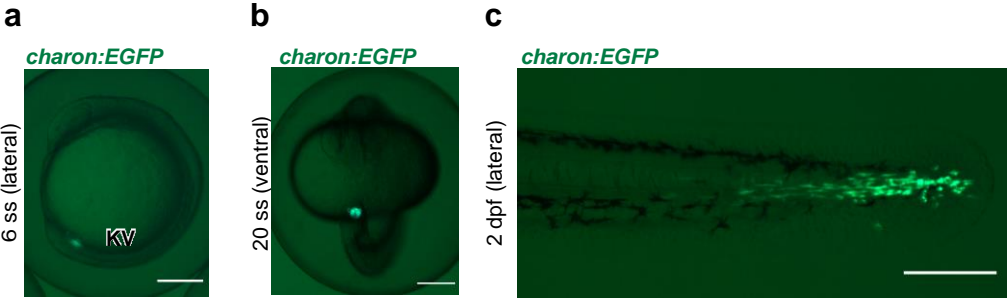

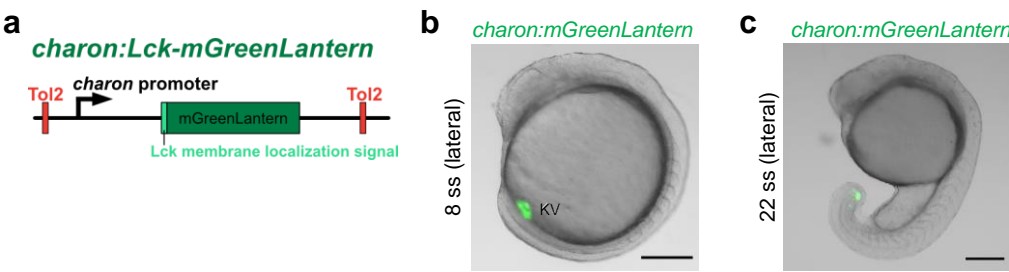

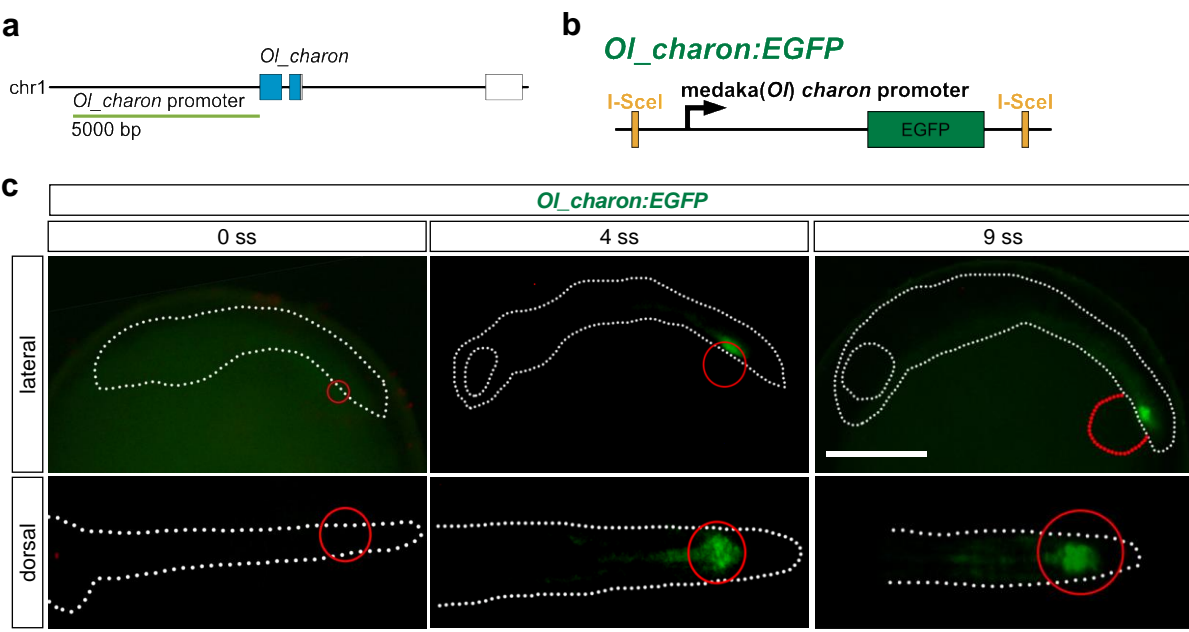

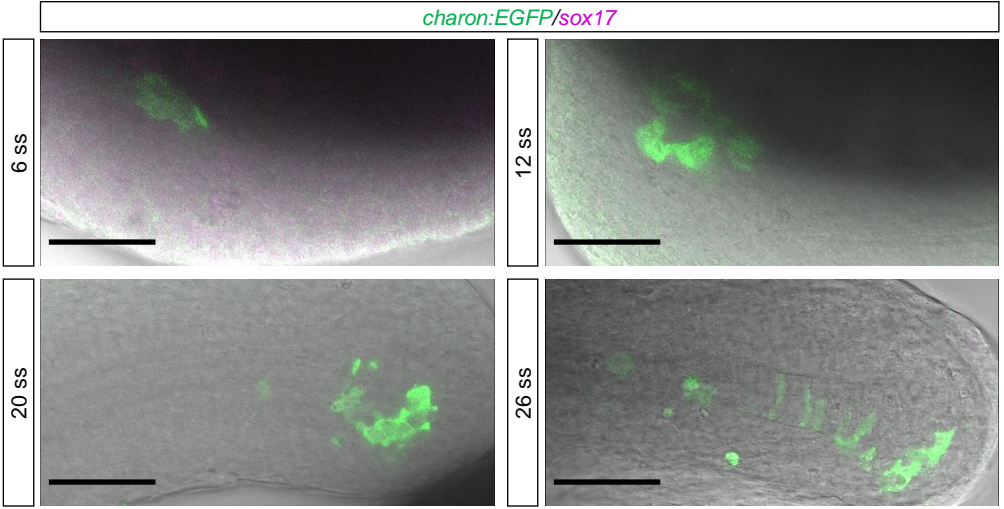

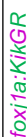

# Supplementary Figure 8

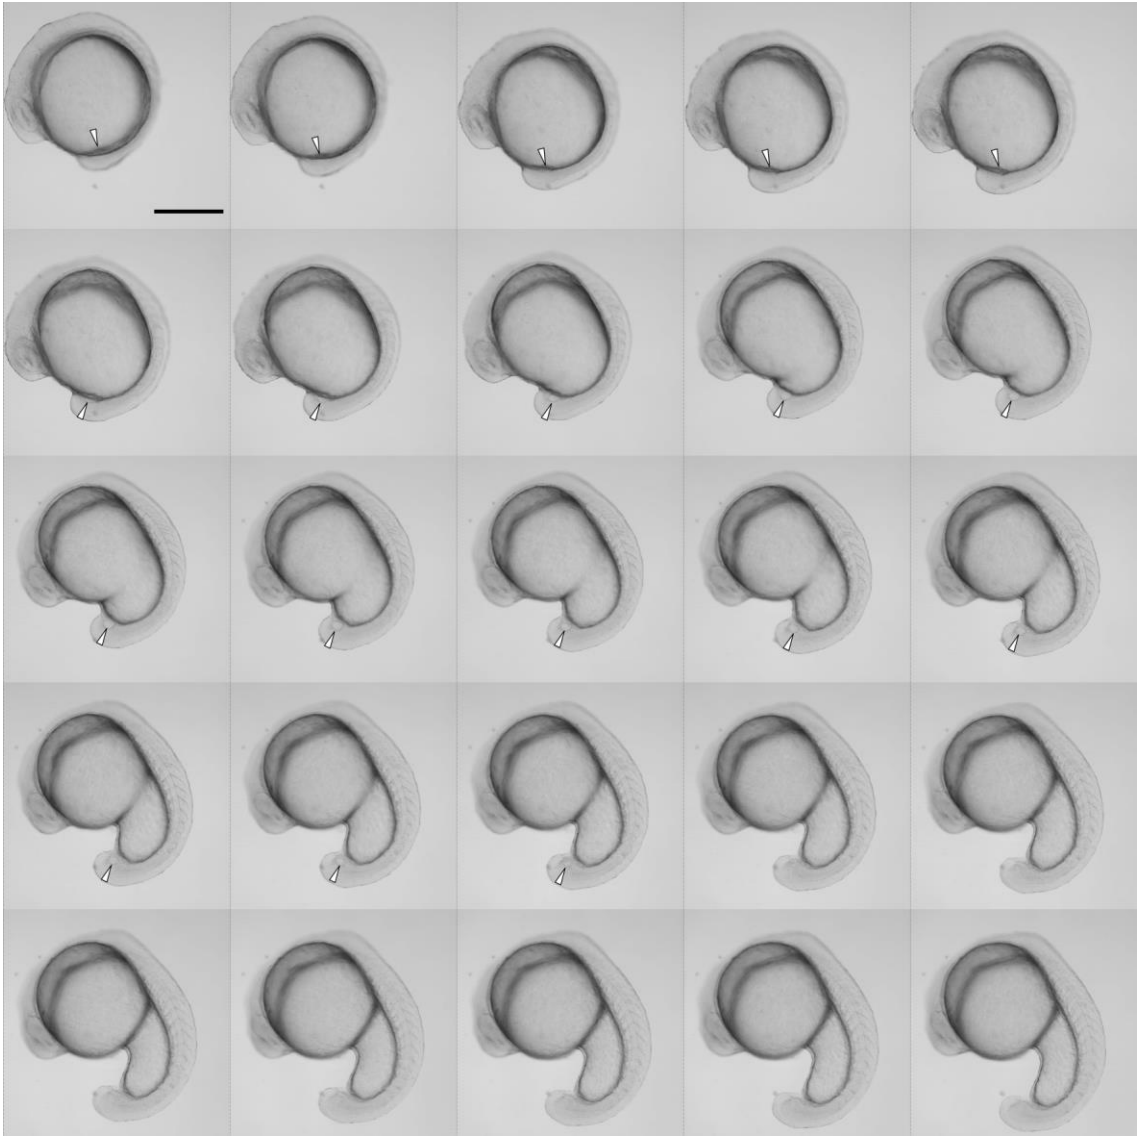

Source: https://biorxiv.org/content/10.1101/2021.11.29.470501v1.full.pdf
